# Supplementary material for: Halogen bonding of electrophilic bromocarbons with pseudohalide anions
Source: Royal Society of Chemistry journal article supplement (doi:10.1039/c4cp00976b), 2014-01-01
Supplement: c4cp00976b1.pdf [file c4cp00976b1.pdf]

**Supporting Information Available for**

**Halogen bonding of electrophilic bromocarbons with pseudohalide anions**

Sergiy V. Rosokha,<sup>†,\*</sup> Charlotte L. Stern,<sup>§</sup> Alan Swartz<sup>†</sup> and Rory Stewart<sup>†</sup>

*<sup>†</sup>Department of Biological, Chemical and Physical Sciences*

*Roosevelt University, Chicago, IL, 60605*

*\*E-mail: [srosokha@roosevelt.edu](mailto:srosokha@roosevelt.edu)*

*<sup>§</sup>Department of Chemistry, Northwestern University,*

*Evanston, Illinois 60208*

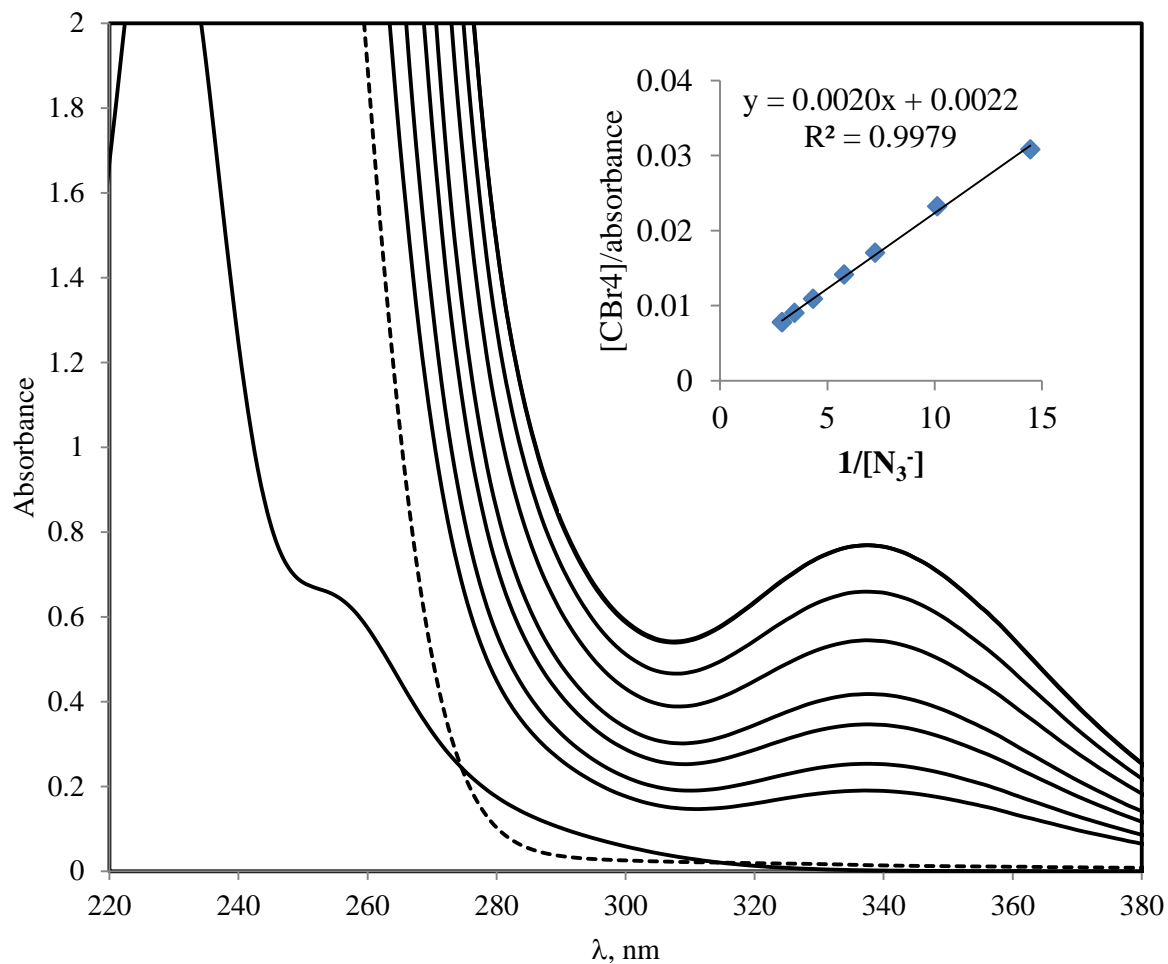

Figure S1. Spectral changes resulting from the addition of  $(\text{Bu}_4\text{N})\text{N}_3$  to 5.2 mM solution of  $\text{CBr}_4$  in dichloromethane (20 °C). Concentration of  $(\text{Bu}_4\text{N})\text{N}_3$  (solid lines, from bottom to top at 300 nm): 0 mM, 69 mM, 99 mM, 138 mM, 173 mM, and 230 mM, 288 mM, 345 mM. Dashed line corresponds to the separate 345 mM solution of  $(\text{Bu}_4\text{N})\text{N}_3$ . Insert: Benesi-Hildebrandt treatment of the spectral data.

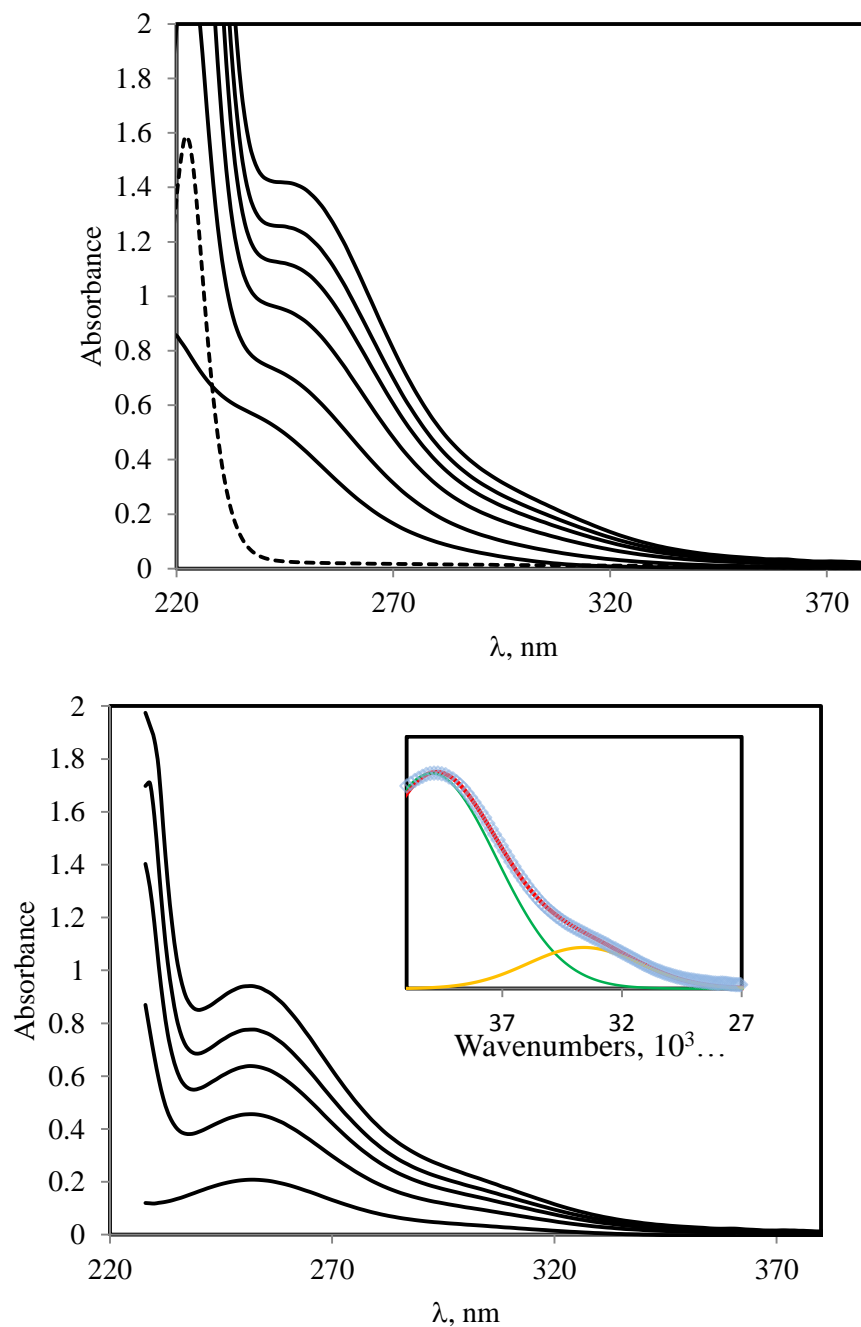

Figure S2. (Top) Spectral changes resulting from the addition of  $(\text{Bu}_4\text{N})\text{NCO}$  to 3.0 mM solution of  $\text{CBr}_3\text{NO}_2$  in dichloromethane (19 °C). Concentration of  $(\text{Bu}_4\text{N})\text{NCO}$  (solid lines, from bottom to top at 270 nm ): 0 mM , 55 mM , 110 mM , 164 mM , 219 mM, and 274 mM . Dashed line corresponds to the separate 55 mM solution of  $(\text{Bu}_4\text{N})\text{NCO}$ . (Bottom): Spectra of the solutions containing  $(\text{Bu}_4\text{N})\text{NCO}$  and  $\text{CBr}_3\text{NO}_2$  after subtracting absorption of the reagents. Insert: Illustration of the deconvolution of the spectrum of the  $[\text{CBr}_3\text{NO}_2, \text{NCO}]$  complex into Gaussian components.

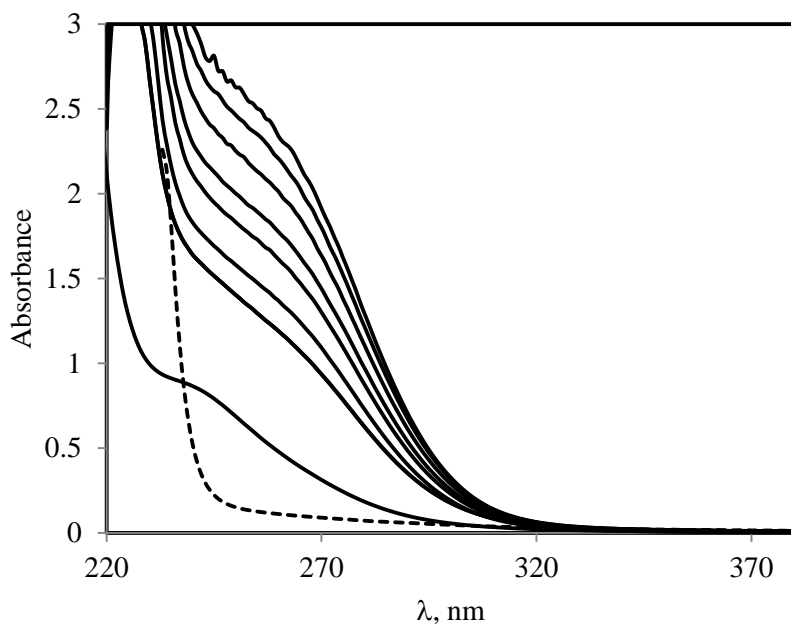

Figure S3. Spectral changes resulting from the addition of  $(\text{Bu}_4\text{N})\text{NCO}$  to 5.3 mM solution of  $\text{CBr}_3\text{CN}$  in dichloromethane ( $20\text{ }^\circ\text{C}$ ). Concentration of  $(\text{Bu}_4\text{N})\text{NCO}$  (solid lines, from bottom to top at 300 nm): 0 mM, 67 mM, 96 mM, 135 mM, 168 mM, and 225 mM, 281 mM, 337 mM. Dashed line corresponds to the separate 337 mM solution of  $(\text{Bu}_4\text{N})\text{NCO}$ .

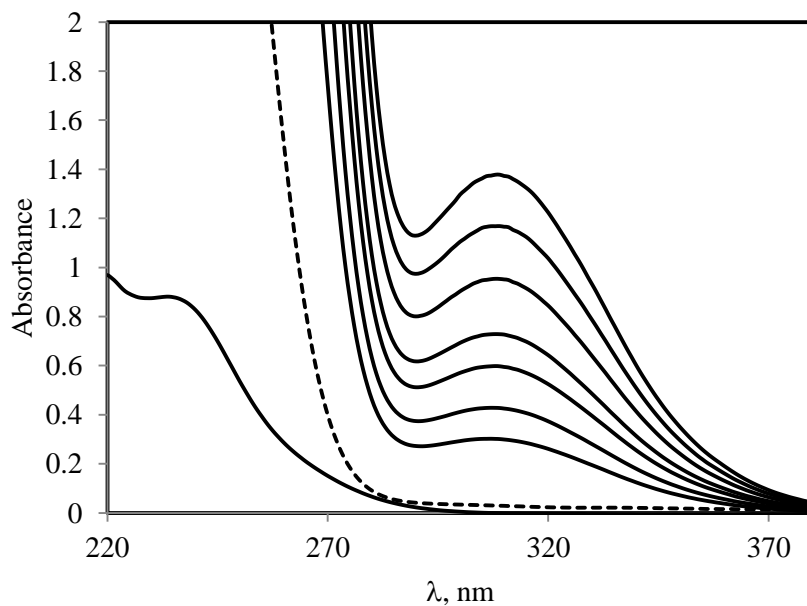

Figure S4. Spectral changes resulting from the addition of  $(\text{Bu}_4\text{N})\text{N}_3$  to 5.9 mM solution of  $\text{CBr}_3\text{F}$  in dichloromethane ( $20\text{ }^\circ\text{C}$ ). Concentration of  $(\text{Bu}_4\text{N})\text{N}_3$  (solid lines, from bottom to top at 310 nm): 0 mM, 25 mM, 50 mM, 86 mM, 131 mM, and 176 mM, 266 mM, 345 mM. Dashed line corresponds to the separate 40 mM solution of  $(\text{Bu}_4\text{N})\text{N}_3$ .

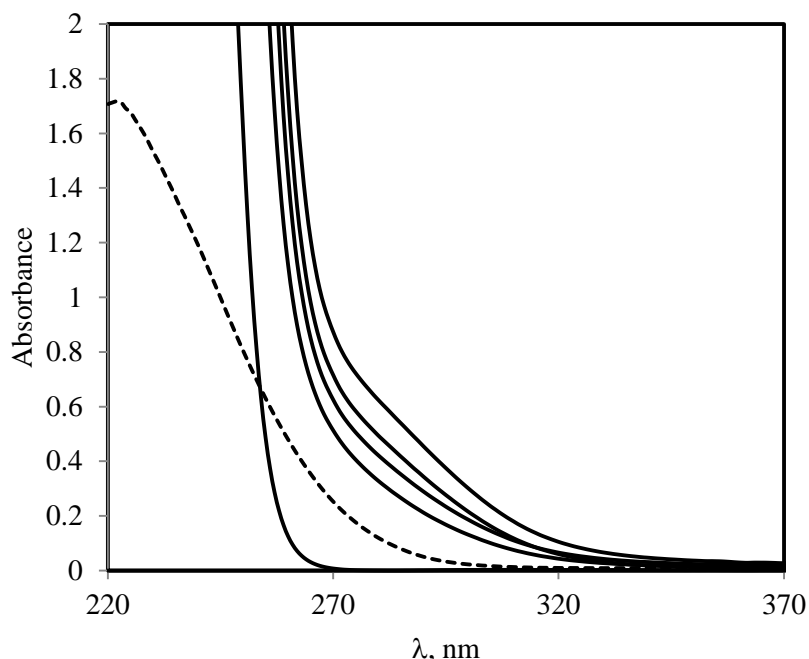

Figure S5. Spectral changes resulting from the addition of  $(\text{Bu}_4\text{N})\text{NCS}$  to 5.3 mM solution of  $\text{CBr}_3\text{CONH}_2$  in dichloromethane ( $20^\circ\text{C}$ ). Concentration of  $(\text{Bu}_4\text{N})\text{NCS}$  (solid lines, from bottom to top at 310 nm): 0 mM, 76 mM, 126 mM, 191 mM, 274 mM, and 421 mM. Dashed line corresponds to the separate 140 mM solution of  $(\text{Bu}_4\text{N})\text{NCS}$ .

Table S1. Details of the Mulliken correlation between the energies of the electronic transition in the  $[\text{R}-\text{Br}, \text{A}^-]$  complex,  $h\nu$ , and difference of the  $E(\text{LUMO})$  of  $\text{R}-\text{Br}$  and  $E(\text{HOMO})$  of anions.

|                                   | $E(\text{LUMO})^a$<br>hartree | $h\nu, 10^3 \text{ cm}^{-1}$ |                |                |               |
|-----------------------------------|-------------------------------|------------------------------|----------------|----------------|---------------|
|                                   |                               | $\text{N}_3^-$               | $\text{NCO}^-$ | $\text{NCS}^-$ | $\text{Br}^-$ |
| $\text{CBr}_4$                    | 0.0465                        | 3.662                        | 4.500          | 3.929          | 4.249         |
| $\text{CHBr}_3$                   | 0.0756                        | 4.210                        | 5.052          | 4.500          | 4.790         |
| $\text{CBr}_3\text{NO}_2$         | 0.0473                        | 3.438                        | 4.167          | 3.750          | 3.877         |
| $\text{CBr}_3\text{CN}$           | 0.0559                        | 3.929                        | 4.670          | 4.125          | 4.338         |
| $\text{CFBr}_3$                   | 0.0613                        | 4.031                        | 4.816          | 4.282          | 4.612         |
| $\text{CBr}_3\text{CONH}_2$       | 0.0726                        | 4.125                        | 4.797          | 4.468          | 4.963         |
| $\text{C}_3\text{Br}_2\text{F}_6$ | 0.1004                        | 4.452                        |                | 4.911          | 5.371         |
| $\text{CBr}_3\text{COCBr}_3$      | 0.0465                        | 3.705                        | 4.268          |                | 3.794         |

a) Energies of LUMO of  $\text{R}-\text{Br}$  molecules. Note that energies of the HOMOs of anions are (in hartrees):  $\text{N}_3^-$ : -0.254,  $\text{NCO}^-$ : -0.311,  $\text{NCS}^-$ : -0.278 and  $\text{Br}^-$ : -0.291. Energies of the frontier orbitals were calculated at  $\text{MP2}/6\text{-}311\text{G}^{**}$  level in  $\text{CH}_2\text{Cl}_2$  using SCIPCM solvation model.

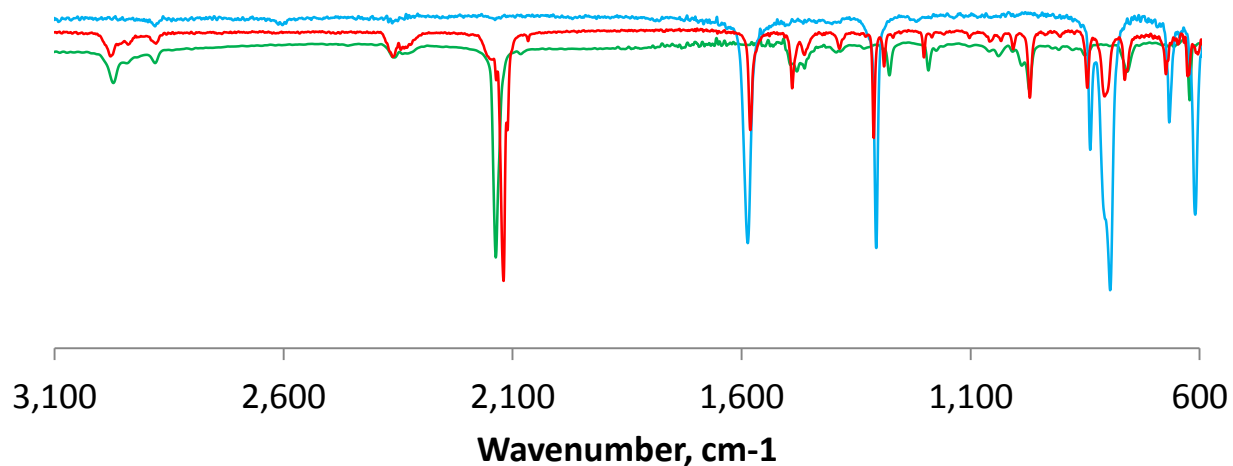

**Figure S6.** FT-IR spectra of  $\text{CBr}_3\text{NO}_2$  (blue),  $\text{Pr}_4\text{N NCO}$  (green) and  $\text{Pr}_4\text{N NCO}\cdot\text{CBr}_3\text{NO}_2$  co-crystals (red).

**Table S2.** Selected vibration frequencies for R-Br molecules,  $\text{Pr}_4\text{NA}$  salts and their co-crystals.<sup>a</sup>

|                                                       | $\nu, \text{cm}^{-1}$                                 |
|-------------------------------------------------------|-------------------------------------------------------|
| $\text{CBr}_4$                                        | 659                                                   |
| $\text{CBr}_3\text{NO}_2$                             | 1589 839 806 795 666 610                              |
| $\text{CBr}_3\text{CONH}_2$                           | 1678 1607 1343 1097 767 708 608 591 585               |
| $\text{Pr}_4\text{N NCO}$                             | 2972 2136 1479 1277 1192 972 757                      |
| $\text{Pr}_4\text{N NCS}$                             | 2972 2054 1475 976 752                                |
| $\text{Pr}_4\text{N N}_3$                             | 2970 1998 1477 971 760                                |
| $\text{Pr}_4\text{N NCO}\cdot\text{CBr}_3\text{NO}_2$ | 2978 2120 1581 1489 1311 1202 971 845 807 763 674 626 |
| $\text{Pr}_4\text{N NCO}\cdot\text{CBr}_4$            | 2975 2120 1489 1285 1199 970 763 677 648              |
| $\text{Pr}_4\text{N N}_3\cdot\text{CBr}_4$            | 2972 1991 1486 971 762 670 645                        |
| $\text{Pr}_4\text{N NCS}\cdot\text{CBr}_4$            | 2972 2054 1485 970 681 672 661                        |

a) Measured as neat liquids or crystalline salts.

Table S3. Characteristics of short (halogen- and hydrogen-bonding) contacts in the [R-Br, A<sup>-</sup>] co-crystals

| Co-crystals                                                  | Contact | D(Z-X...Y),<br>Å | ∠(Z-X...Y),<br>deg | ∠X-X...Br),<br>deg | R    |
|--------------------------------------------------------------|---------|------------------|--------------------|--------------------|------|
| (Pr <sub>4</sub> N)NCO·CBr <sub>4</sub>                      | Br3N1   | 2.875(3)         | 167.66(12)         | 99.3(2)            | 0.85 |
|                                                              | Br3N2   | 3.251(2)         | 155.08(10)         |                    | 0.96 |
|                                                              | Br2 N1  | 2.806 (3)        | 176.90(11)         | 108.2(2)           | 0.83 |
|                                                              | Br3N2   | 3.331(3)         |                    |                    | 0.98 |
|                                                              | Br4N1   | 3.216(4)         | 160.48(18)         | 79.0 (2)           | 0.95 |
|                                                              | Br3N2   | 3.198(2)         | 175.69(11)         | 136.5(2)           | 0.94 |
| (Pr <sub>4</sub> N)NCO·CBr <sub>4</sub>                      | Br2 N1  | 2.823(3)         | 176.39(12)         | 109.7(3)           | 0.83 |
|                                                              | Br2 C2  | 3.384(3)         | 164.07(11)         |                    | 0.95 |
|                                                              | Br4N1   | 2.937(3)         | 167.40(12)         | 96.5(2)            | 0.86 |
|                                                              | Br4 C2  | 3.270(3)         | 154.65(11)         |                    | 0.92 |
|                                                              | Br3N1   | 3.188(3)         | 173.74(12)         | 79.8(2)            | 0.94 |
|                                                              | Br3 C2  | 3.190(3)         | 163.03(12)         |                    | 0.90 |
| (Pr <sub>4</sub> N)NCO·CBr <sub>3</sub> NO <sub>2</sub>      | Br2N3   | 3.004(3)         | 167.74(9)          | 94.4(2)            | 0.88 |
|                                                              | Br2C14  | 3.291(2)         | 153.96(9)          |                    | 0.93 |
|                                                              | Br1N3   | 2.763(3)         | 176.06(9)          | 112.9(2)           | 0.81 |
|                                                              | Br1C14  | 3.369(3)         | 165.37(9)          |                    | 0.95 |
|                                                              | Br3N3   | 3.212(3)         | 173.50(9)          | 80.3(2)            | 0.94 |
|                                                              | Br3C14  | 3.221(3)         | 166.09(9)          |                    | 0.91 |
| 2((Pr <sub>4</sub> N)NCS)·CBr <sub>4</sub>                   | Br4S1   | 3.2309(11)       | 171.76(11)         | 93.23(13)          | 0.92 |
|                                                              | Br1S1   | 3.2147(11)       | 170.15(11)         | 108.83(13)         | 0.91 |
|                                                              | Br3N1   | 3.013(3)         | 167.07(13)         | 139.2(3)           | 0.89 |
|                                                              | Br2N2   | 2.897(4)         | 172.74(13)         | 136.5(3)           | 0.85 |
| 2((Pr <sub>4</sub> N)NCS)·CBr <sub>3</sub> CONH <sub>2</sub> | Br2S2   | 3.2294(6)        | 174.50(6)          | 96.21(8)           | 0.88 |
|                                                              | Br3S1   | 3.3377(6)        | 178.02(6)          | 79.13(8)           | 0.91 |
|                                                              | Br3C3   | 3.434(2)         | 150.47(8)          |                    | 0.97 |
|                                                              | Br1S1   | 3.5286(6)        | 151.85(7)          | 123.56(8)          | 0.95 |
|                                                              | H1a N2  | 2.101(3)         |                    |                    |      |

Table S4. Intramolecular bond lengths (in Å) of bromocarbon and pseudohalides in the [ R-Br, A ] co-crystals

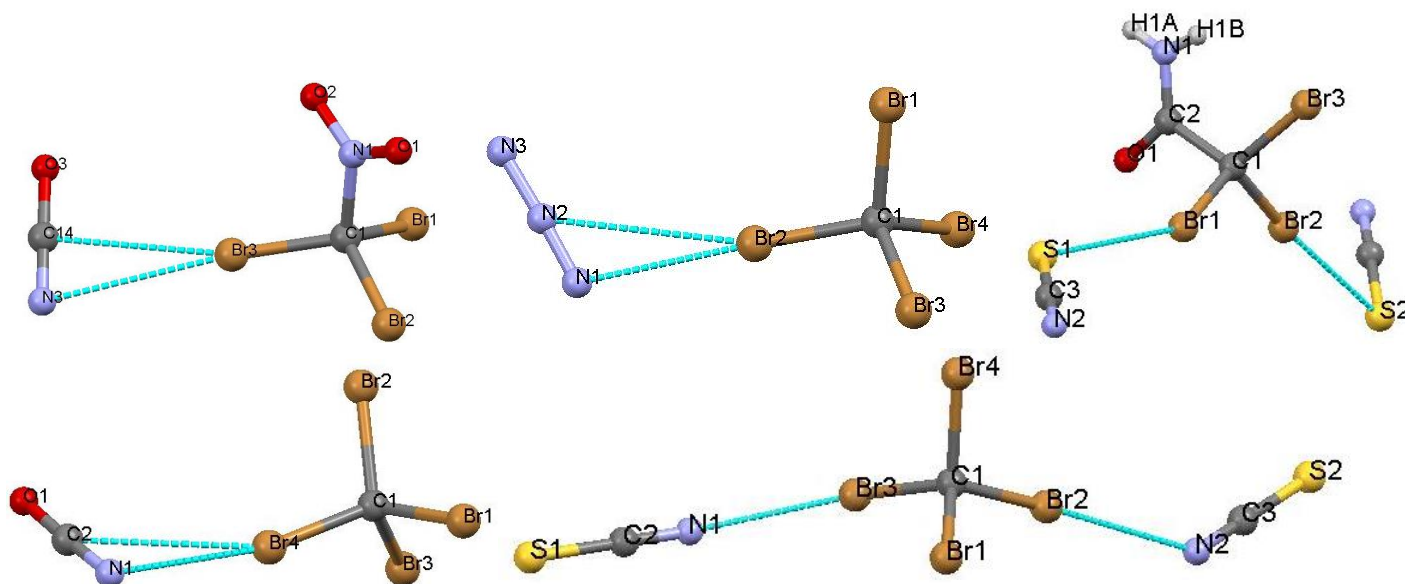

| Co-crystal                                              | Bond   |        | d, Å     | Co-crystal                                                   | Bond   |          | d, Å     |
|---------------------------------------------------------|--------|--------|----------|--------------------------------------------------------------|--------|----------|----------|
|                                                         | Atom 1 | Atom 2 |          |                                                              | Atom 1 | Atom 2   |          |
| (Pr <sub>4</sub> N)N <sub>3</sub> ·CBr <sub>4</sub>     | Br1    | C1     | 1.939(3) | 2((Pr <sub>4</sub> N)NCS)·CBr <sub>4</sub>                   | Br1    | C1       | 1.945(4) |
|                                                         | Br2    | C1     | 1.945(3) |                                                              | Br2    | C1       | 1.938(4) |
|                                                         | Br3    | C1     | 1.943(3) |                                                              | Br3    | C1       | 1.932(4) |
|                                                         | Br4    | C1     | 1.967(4) |                                                              | Br4    | C1       | 1.948(4) |
|                                                         | N1     | N2     | 1.121(4) |                                                              | S1     | C2       | 1.653(4) |
|                                                         | N2     | N3     | 1.209(4) |                                                              | N1     | C2       | 1.166(5) |
| (Pr <sub>4</sub> N)NCO·CBr <sub>4</sub>                 | Br1    | C1     | 1.955(3) | 2((Pr <sub>4</sub> N)NCS)·CBr <sub>3</sub> CONH <sub>2</sub> | Br1    | C1       | 1.956(2) |
|                                                         | Br2    | C1     | 1.936(3) |                                                              | Br2    | C1       | 1.943(2) |
|                                                         | Br3    | C1     | 1.939(4) |                                                              | Br3    | C1       | 1.950(2) |
|                                                         | Br4    | C1     | 1.938(4) |                                                              | O1     | C2       | 1.231(3) |
|                                                         | O1     | C2     | 1.245(4) |                                                              | N1     | H1A      | 0.79(3)  |
|                                                         | N1     | C2     | 1.145(4) |                                                              | N1     | H1B      | 0.79(3)  |
| (Pr <sub>4</sub> N)NCO·CBr <sub>3</sub> NO <sub>2</sub> | Br1    | C1     | 1.934(1) | N1                                                           | C2     | 1.251(3) |          |
|                                                         | Br2    | C1     | 1.917(2) | C1                                                           | C2     | 1.601(3) |          |
|                                                         | Br3    | C1     | 1.919(2) | S1                                                           | C3     | 1.650(3) |          |
|                                                         | O1     | N1     | 1.206(2) | N2                                                           | C3     | 1.156(4) |          |
|                                                         | O2     | N1     | 1.210(2) | S2                                                           | C4     | 1.648(3) |          |
|                                                         | N1     | C1     | 1.562(2) | N3                                                           | C4     | 1.167(4) |          |
|                                                         | O3     | C14    | 1.240(2) | S1                                                           | C3     | 1.650(3) |          |
|                                                         | N3     | C14    | 1.133(3) | N2                                                           | C3     | 1.156(4) |          |



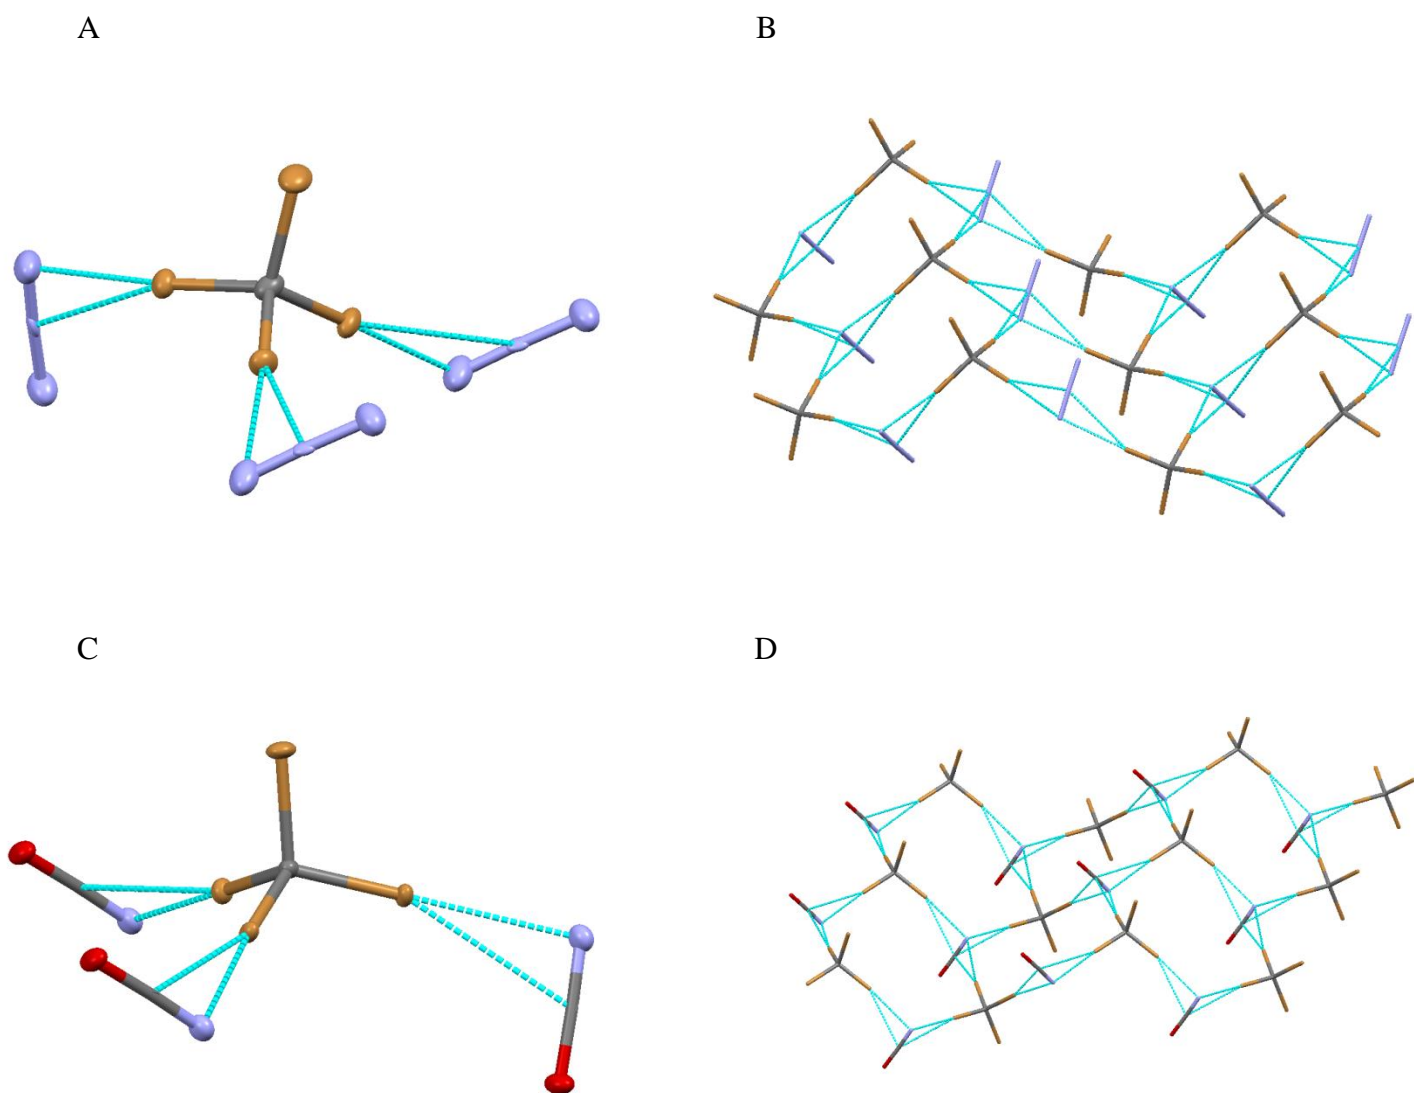

Figure S7. Fragments of the X-ray structure of the  $(\text{Pr}_4\text{N})_3\cdot\text{CBr}_4$  (A and B) and  $(\text{Pr}_4\text{N})\text{NCO}\cdot\text{CBr}_4$  (C and D) co-crystals illustrating short contacts (blue lines) between carbon tetrabromide and azide or cyanate anions (A and C) and zigzag layer formed by (3:3) coordination of carbon tetrabromide and azide or cyanate anions (B and D, for clarity,  $\text{Pr}_4\text{N}^+$  cations are not shown).

Table S5. Energies (in hartrees) of the halogen bonded complexes [R-Br, A<sup>-</sup>] and separate anions resulted from the M06-2X/6-311+G(dp) calculations in the gas phase and in CH<sub>2</sub>Cl<sub>2</sub>.<sup>a</sup>

| Anion                       | R-Br                                            | Gas-phase       | CH <sub>2</sub> Cl <sub>2</sub> |
|-----------------------------|-------------------------------------------------|-----------------|---------------------------------|
| N <sub>3</sub> <sup>-</sup> | CBr <sub>4</sub>                                | -10498.98559110 | -10499.05548890                 |
| N <sub>3</sub> <sup>-</sup> | CBr <sub>3</sub> NO <sub>2</sub>                | -8129.90314952  | -8129.96970886                  |
| N <sub>3</sub> <sup>-</sup> | CBr <sub>3</sub> CONH <sub>2</sub>              | -8094.11818333  | -8094.19519474                  |
| N <sub>3</sub> <sup>-</sup> | CBr <sub>3</sub> F                              | -8024.66287964  | -8024.73451545                  |
| N <sub>3</sub> <sup>-</sup> | CBr <sub>3</sub> H                              | -7925.42429751  | -7925.50157568                  |
| N <sub>3</sub> <sup>-</sup> | CBr <sub>3</sub> CN                             | -8017.65480388  | -8017.72179079                  |
| N <sub>3</sub> <sup>-</sup> | C <sub>3</sub> Br <sub>2</sub> F <sub>6</sub>   | -6025.93326282  | -6026.00428654                  |
| NCO <sup>-</sup>            | CBr <sub>4</sub>                                | -10502.88976080 | -10502.96274580                 |
| NCO <sup>-</sup>            | CBr <sub>3</sub> NO <sub>2</sub>                | -8133.80659367  | -8133.87685476                  |
| NCO <sup>-</sup>            | CBr <sub>3</sub> CONH <sub>2</sub>              | -8098.02439943  | -8098.10289668                  |
| NCO <sup>-</sup>            | CBr <sub>3</sub> F                              | -8028.56866567  | -8028.64230714                  |
| NCO <sup>-</sup>            | CBr <sub>3</sub> H                              | -7929.33101440  | -7929.40943115                  |
| NCO <sup>-</sup>            | CBr <sub>3</sub> CN                             | -8021.55854610  | -8021.62888330                  |
| NCO <sup>-</sup>            | C <sub>3</sub> Br <sub>2</sub> F <sub>6</sub>   | -6029.83979854  | -6029.91217884                  |
| NCS <sup>-</sup>            | CBr <sub>4</sub>                                | -10825.86056390 | -10825.93047600                 |
| NCS <sup>-</sup>            | CBr <sub>3</sub> NO <sub>2</sub>                | -8456.77682680  | -8456.84387781                  |
| NCS <sup>-</sup>            | CBr <sub>3</sub> CONH <sub>2</sub>              |                 | -8421.06902024                  |
| NCS <sup>-</sup>            | CBr <sub>3</sub> CONH <sub>2</sub> <sup>b</sup> | -8421.00915366  | -8421.07676758                  |
| NCS <sup>-</sup>            | CBr <sub>3</sub> CONH <sub>2</sub> <sup>c</sup> | -8421.00623032  | -8421.07564690                  |
| NCS <sup>-</sup>            | CBr <sub>3</sub> F                              | -8351.53928018  | -8351.60979068                  |
| NCS <sup>-</sup>            | CBr <sub>3</sub> H                              | -8252.30341054  | -8252.37777285                  |
| NCS <sup>-</sup>            | CBr <sub>3</sub> CN                             | -8344.52894764  | -8344.59617800                  |
| NCS <sup>-</sup>            | C <sub>3</sub> Br <sub>2</sub> F <sub>6</sub>   | -6352.81043855  | -6352.87964628                  |
| N <sub>3</sub> <sup>-</sup> | -                                               | -164.21257800   | -164.30248827                   |
| NCO <sup>-</sup>            | -                                               | -168.11985138   | -168.21112349                   |
| NCS <sup>-</sup>            | -                                               | -491.09806424   | -491.17992038                   |

- a) See ref. 10 for the energies of the separate bromocarbons. For clarity, only characteristics of the lowest-energy halogen-bonded complexes are listed, if not mentioned otherwise. b) Adduct bonded via combination of Br...S/H...N bonds. c) Adduct bonded via combination of Br...N/H...S bonds.

Table S6. Amount of  $A^- \rightarrow R-Br$  charge transfer,  $\Delta q$  (in e) determined via NBO analysis of the  $[R-Br, A^-]$  complexes in the gas phase and in  $CH_2Cl_2$ <sup>a</sup> and corresponding intermolecular separation,  $D_{Br...X}$  (in Å) and  $R_{XY} = D_{X...Y}/(r_X + r_Y)$  (where  $r_X$  and  $r_Y$  are van der Waals radii).<sup>a</sup>

| Anion   | R-Br          | Gas-phase      |                  |          | CH <sub>2</sub> Cl <sub>2</sub> |                  |          |
|---------|---------------|----------------|------------------|----------|---------------------------------|------------------|----------|
|         |               | $\Delta q$ , e | $D_{Br...X}$ , Å | $R_{XY}$ | $\Delta q$ , e                  | $D_{Br...X}$ , Å | $R_{XY}$ |
| $N_3^-$ | $CBr_4$       | 0.254          | 2.371            | 0.697    | 0.083                           | 2.708            | 0.796    |
| $N_3^-$ | $CBr_3NO_2$   | 0.316          | 2.293            | 0.674    | 0.126                           | 2.584            | 0.760    |
| $N_3^-$ | $CBr_3CONH_2$ | 0.188          | 2.465            | 0.725    | 0.063                           | 2.778            | 0.817    |
| $N_3^-$ | $CBr_3F$      | 0.195          | 2.453            | 0.722    | 0.064                           | 2.774            | 0.816    |
| $N_3^-$ | $CBr_3H$      | 0.150          | 2.538            | 0.746    | 0.046                           | 2.864            | 0.842    |
| $N_3^-$ | $CBr_3CN$     | 0.291          | 2.318            | 0.682    | 0.112                           | 2.617            | 0.770    |
| $N_3^-$ | $C_3Br_2F_6$  | 0.170          | 2.480            | 0.729    | 0.061                           | 2.771            | 0.815    |
| $NCO^-$ | $CBr_4$       | 0.160          | 2.426            | 0.713    | 0.048                           | 2.752            | 0.809    |
| $NCO^-$ | $CBr_3NO_2$   | 0.215          | 2.341            | 0.689    | 0.066                           | 2.677            | 0.787    |
| $NCO^-$ | $CBr_3CONH_2$ | 0.097          | 2.553            | 0.751    | 0.039                           | 2.809            | 0.826    |
| $NCO^-$ | $CBr_3F$      | 0.110          | 2.514            | 0.739    | 0.042                           | 2.773            | 0.816    |
| $NCO^-$ | $CBr_3H$      | 0.080          | 2.592            | 0.762    | 0.028                           | 2.895            | 0.852    |
| $NCO^-$ | $CBr_3CN$     | 0.198          | 2.363            | 0.695    | 0.065                           | 2.697            | 0.793    |
| $NCO^-$ | $C_3Br_2F_6$  | 0.097          | 2.538            | 0.746    | 0.037                           | 2.780            | 0.818    |
| $NCS^-$ | $CBr_4$       | 0.215          | 2.861            | 0.784    | 0.064                           | 3.187            | 0.873    |
| $NCS^-$ | $CBr_3NO_2$   | 0.301          | 2.746            | 0.752    | 0.084                           | 3.117            | 0.854    |
| $NCS^-$ | $CBr_3CONH_2$ | b              |                  |          | 0.042                           | 3.295            | 0.903    |
| $NCS^-$ | $CBr_3F$      | 0.156          | 2.957            | 0.810    | 0.049                           | 3.250            | 0.890    |
| $NCS^-$ | $CBr_3H$      | 0.105          | 3.083            | 0.845    | 0.035                           | 3.322            | 0.910    |
| $NCS^-$ | $CBr_3CN$     | 0.271          | 2.778            | 0.761    | 0.080                           | 3.131            | 0.858    |
| $NCS^-$ | $C_3Br_2F_6$  | 0.112          | 3.046            | 0.834    | 0.046                           | 3.253            | 0.891    |

- a) For clarity, only characteristics of the lowest-energy halogen-bonded complexes, e.g. adducts bonded via nitrogen end of  $NCO^-$ , and sulfur end of  $NCS^-$  are listed. b) Only adduct formed via combination of halogen and hydrogen bonds was found.

Table S7. Elongation of the C-Br bond lengths ( $\Delta d$ , in Å) established as a sum of the differences between the corresponding bond length in the separate and halogen-bonded bromocarbons (C-Br<sub>S</sub> and C-Br<sub>C</sub>, respectively, in Å).<sup>a</sup>

| A <sup>-</sup>              | R-Br                                          | $\Delta d$ | C-Br <sub>S</sub> <sup>a</sup> |         | C-Br <sub>C</sub> <sup>b</sup> |         |         |
|-----------------------------|-----------------------------------------------|------------|--------------------------------|---------|--------------------------------|---------|---------|
| Gas-phase                   |                                               |            |                                |         |                                |         |         |
| N <sub>3</sub> <sup>-</sup> | CBr <sub>4</sub>                              | 0.14522    | 1.942388                       | 2.02383 | 1.96096                        | 1.96443 | 1.96555 |
| N <sub>3</sub> <sup>-</sup> | CBr <sub>3</sub> NO <sub>2</sub>              | 0.1763     | 1.922593                       | 2.08165 | 1.93167                        | 1.93076 |         |
| N <sub>3</sub> <sup>-</sup> | CBr <sub>3</sub> CONH <sub>2</sub>            | 0.08634    | 1.94333                        | 2.00714 | 1.93899                        | 1.9702  |         |
| N <sub>3</sub> <sup>-</sup> | CBr <sub>3</sub> F                            | 0.10601    | 1.937457                       | 1.97971 | 1.96933                        | 1.96934 |         |
| N <sub>3</sub> <sup>-</sup> | CBr <sub>3</sub> H                            | 0.07802    | 1.930933                       | 1.95803 | 1.95635                        | 1.95644 |         |
| N <sub>3</sub> <sup>-</sup> | CBr <sub>3</sub> CN                           | 0.15083    | 1.94379                        | 2.06903 | 1.9578                         | 1.95537 |         |
| N <sub>3</sub> <sup>-</sup> | C <sub>3</sub> Br <sub>2</sub> F <sub>6</sub> | 0.07198    | 1.927795                       | 1.98457 | 1.943                          |         |         |
| NCO <sup>-</sup>            | CBr <sub>4</sub>                              | 0.09922    | 1.942388                       | 1.97743 | 1.96268                        | 1.96252 | 1.96614 |
| NCO <sup>-</sup>            | CBr <sub>3</sub> NO <sub>2</sub>              | 0.12075    | 1.922593                       | 2.01807 | 1.93524                        | 1.93522 |         |
| NCO <sup>-</sup>            | CBr <sub>3</sub> CONH <sub>2</sub>            | 0.04616    | 1.94333                        | 1.95936 | 1.97219                        | 1.9446  |         |
| NCO <sup>-</sup>            | CBr <sub>3</sub> F                            | 0.06538    | 1.937457                       | 1.9422  | 1.96565                        | 1.9699  |         |
| NCO <sup>-</sup>            | CBr <sub>3</sub> H                            | 0.05261    | 1.930933                       | 1.92873 | 1.9579                         | 1.95878 |         |
| NCO <sup>-</sup>            | CBr <sub>3</sub> CN                           | 0.10602    | 1.94379                        | 2.01286 | 1.96169                        | 1.96284 |         |
| NCO <sup>-</sup>            | C <sub>3</sub> Br <sub>2</sub> F <sub>6</sub> | 0.03272    | 1.927795                       | 1.94801 | 1.9403                         |         |         |
| NCS <sup>-</sup>            | CBr <sub>4</sub>                              | 0.09897    | 1.942388                       | 1.99297 | 1.9608                         | 1.95805 | 1.9567  |
| NCS <sup>-</sup>            | CBr <sub>3</sub> NO <sub>2</sub>              | 0.13092    | 1.922593                       | 2.04198 | 1.92651                        | 1.93021 |         |
| NCS <sup>-</sup>            | CBr <sub>3</sub> F                            | 0.07035    | 1.937457                       | 1.95819 | 1.96055                        | 1.96398 |         |
| NCS <sup>-</sup>            | CBr <sub>3</sub> H                            | 0.04623    | 1.930933                       | 1.93815 | 1.95045                        | 1.95043 |         |
| NCS <sup>-</sup>            | CBr <sub>3</sub> CN                           | 0.11048    | 1.94379                        | 2.03397 | 1.95687                        | 1.95101 |         |
| NCS <sup>-</sup>            | C <sub>3</sub> Br <sub>2</sub> F <sub>6</sub> | 0.02404    | 1.927795                       | 1.94903 | 1.9306                         |         |         |
| N <sub>3</sub> <sup>-</sup> | CBr <sub>4</sub>                              | 0.03307    | 1.943008                       | 1.95739 | 1.94842                        | 1.94902 | 1.95027 |
| N <sub>3</sub> <sup>-</sup> | CBr <sub>3</sub> NO <sub>2</sub>              | 0.05451    | 1.921727                       | 1.97365 | 1.92235                        | 1.92369 |         |
| N <sub>3</sub> <sup>-</sup> | CBr <sub>3</sub> CONH <sub>2</sub>            | 0.01987    | 1.944407                       | 1.95682 | 1.95994                        | 1.93633 |         |
| N <sub>3</sub> <sup>-</sup> | CBr <sub>3</sub> F                            | 0.02544    | 1.937003                       | 1.94136 | 1.94713                        | 1.94796 |         |
| N <sub>3</sub> <sup>-</sup> | CBr <sub>3</sub> H                            | 0.01682    | 1.93238                        | 1.93397 | 1.93969                        | 1.9403  |         |
| N <sub>3</sub> <sup>-</sup> | CBr <sub>3</sub> CN                           | 0.04532    | 1.942843                       | 1.97519 | 1.94989                        | 1.94877 |         |

Table S7.(cont.) Elongation of the C-Br bond lengths ( $\Delta d$ , in Å)

| $A^-$   | R-Br          | Dd      | C-Br <sub>S</sub> <sup>a</sup> |         | C-Br <sub>C</sub> <sup>b</sup> |         |         |
|---------|---------------|---------|--------------------------------|---------|--------------------------------|---------|---------|
| $N_3^-$ | $C_3Br_2F_6$  | 0.01999 | 1.925765                       | 1.93794 | 1.93358                        |         |         |
| $NCO^-$ | $CBr_4$       | 0.02398 | 1.943008                       | 1.9435  | 1.94993                        | 1.95173 | 1.95085 |
| $NCO^-$ | $CBr_3NO_2$   | 0.03005 | 1.921727                       | 1.94733 | 1.92634                        | 1.92156 |         |
| $NCO^-$ | $CBr_3CONH_2$ | 0.01575 | 1.944407                       | 1.94741 | 1.96354                        | 1.93802 |         |
| $NCO^-$ | $CBr_3F$      | 0.01638 | 1.937003                       | 1.93345 | 1.94831                        | 1.94563 |         |
| $NCO^-$ | $CBr_3H$      | 0.01338 | 1.93238                        | 1.92795 | 1.94128                        | 1.94129 |         |
| $NCO^-$ | $CBr_3CN$     | 0.02934 | 1.942843                       | 1.95504 | 1.95155                        | 1.95128 |         |
| $NCO^-$ | $C_3Br_2F_6$  | 0.00909 | 1.925765                       | 1.92881 | 1.93181                        |         |         |
| $NCS^-$ | $CBr_4$       | 0.02105 | 1.943008                       | 1.95274 | 1.94607                        | 1.94628 | 1.94799 |
| $NCS^-$ | $CBr_3NO_2$   | 0.03059 | 1.921727                       | 1.95294 | 1.92414                        | 1.91869 |         |
| $NCS^-$ | $CBr_3CONH_2$ | 0.01437 | 1.944407                       | 1.94003 | 1.95646                        | 1.9511  |         |
| $NCS^-$ | $CBr_3F$      | 0.01601 | 1.937003                       | 1.93993 | 1.94344                        | 1.94365 |         |
| $NCS^-$ | $CBr_3H$      | 0.01185 | 1.93238                        | 1.93399 | 1.9375                         | 1.9375  |         |
| $NCS^-$ | $CBr_3CN$     | 0.02693 | 1.942843                       | 1.9611  | 1.94555                        | 1.94881 |         |
| $NCS^-$ | $C_3Br_2F_6$  | 0.01225 | 1.925765                       | 1.93322 | 1.93056                        |         |         |

<sup>a)</sup> Average C-Br bond length in the separate R-Br molecule (from ref. 10). <sup>b)</sup> C-Br bond length in the halogen-bonded R-Br molecules  $A_s$  in Table S6, only characteristics of the lowest-energy halogen-bonded complexes are listed. Note that Figure 10 demonstrates correlation between values of  $\Delta d$  from Table S7 and  $\Delta q$  from Table S6.

Table S8. Atomic coordinate resulted from M06-2X/6-311+G(dp) computations of the [R-Br,A<sup>-</sup>] complexes in gas-phase and in dichloromethane (the coordinates of the lowest-energy halogen-bonded adducts are presented, i.e. C-Br...N≡C bonding in complexes with NCO<sup>-</sup> and C-Br...S-C bonding in complexes with NCS, if not stated otherwise}.

| Anion                       | R-Br                               | Gas-phase calculations |             |             |             |
|-----------------------------|------------------------------------|------------------------|-------------|-------------|-------------|
| N <sub>3</sub> <sup>-</sup> | CBr <sub>4</sub>                   | Br                     | -1.26279000 | -0.26503400 | 1.83233400  |
|                             |                                    | Br                     | 1.36132600  | 0.47035000  | 0.00275600  |
|                             |                                    | Br                     | -1.66427700 | 1.42719900  | -0.83150100 |
|                             |                                    | Br                     | -0.92068500 | -1.66047300 | -1.00433500 |
|                             |                                    | C                      | -0.60576100 | -0.00552200 | -0.00068800 |
|                             |                                    | N                      | 4.32011800  | 0.03604300  | 0.00138600  |
|                             |                                    | N                      | 3.66543000  | 1.03031400  | 0.01001600  |
|                             |                                    | N                      | 4.96581100  | -0.92183000 | -0.00708400 |
| N <sub>3</sub> <sup>-</sup> | CBr <sub>3</sub> NO <sub>2</sub>   | Br                     | -1.29796400 | -0.14242800 | 0.44727700  |
|                             |                                    | Br                     | 1.40689600  | -1.45477400 | -0.95256000 |
|                             |                                    | Br                     | 1.24742900  | 1.69250400  | -0.63103700 |
|                             |                                    | C                      | 0.75731400  | -0.00533200 | 0.14676900  |
|                             |                                    | N                      | -4.12243800 | 0.00864800  | -0.24930700 |
|                             |                                    | N                      | -3.56414000 | -0.29890300 | 0.76102200  |
|                             |                                    | N                      | -4.67508400 | 0.30191400  | -1.21588200 |
|                             |                                    | N                      | 1.37927800  | -0.11612900 | 1.54047900  |
|                             |                                    | O                      | 1.50014000  | 0.90606900  | 2.17342000  |
| O                           | 1.60738200                         | -1.22760700            | 1.95613400  |             |             |
| N <sub>3</sub> <sup>-</sup> | CBr <sub>3</sub> CONH <sub>2</sub> | Br                     | 1.24931700  | -0.16940600 | 0.33800400  |
|                             |                                    | Br                     | -1.29043400 | 1.81560100  | -0.05102300 |
|                             |                                    | Br                     | -1.36605900 | -1.07354500 | -1.38944100 |
|                             |                                    | C                      | -0.74560300 | -0.03278700 | 0.16412400  |
|                             |                                    | N                      | 4.30333800  | 0.10949300  | -0.13294100 |
|                             |                                    | N                      | 3.67053600  | -0.47037300 | 0.68798400  |
|                             |                                    | N                      | 4.92943000  | 0.67089900  | -0.92918900 |
|                             |                                    | C                      | -1.48351700 | -0.64650300 | 1.38444700  |
|                             |                                    | O                      | -2.49915200 | -0.17586800 | 1.83677100  |
|                             |                                    | N                      | -0.91600100 | -1.78830500 | 1.84834800  |
|                             |                                    | H                      | -1.32680100 | -2.18919500 | 2.67538000  |
| H                           | 0.03479200                         | -2.02284800            | 1.60568300  |             |             |
| N <sub>3</sub> <sup>-</sup> | CBr <sub>3</sub> F                 | Br                     | 1.15573700  | -0.00013100 | 0.52030700  |
|                             |                                    | Br                     | -1.55915900 | 1.60199900  | -0.40056100 |
|                             |                                    | Br                     | -1.55931700 | -1.60186400 | -0.40071000 |
|                             |                                    | C                      | -0.82350700 | -0.00001400 | 0.47731400  |
|                             |                                    | N                      | 4.06989000  | 0.00001800  | -0.41968500 |
|                             |                                    | N                      | 3.60428200  | -0.00018100 | 0.67275300  |
|                             |                                    | N                      | 4.53112400  | 0.00022500  | -1.48224900 |
|                             |                                    | F                      | -1.31112600 | -0.00005100 | 1.73045900  |

|                |                                   |    |             |             |             |
|----------------|-----------------------------------|----|-------------|-------------|-------------|
| $\text{N}_3^-$ | $\text{CBr}_3\text{H}$            | Br | 1.07329500  | -0.00110600 | -0.55148200 |
|                |                                   | Br | -1.66932500 | -1.60251900 | 0.22644700  |
|                |                                   | Br | -1.66767200 | 1.60366300  | 0.22521500  |
|                |                                   | C  | -0.88457800 | -0.00008800 | -0.57607600 |
|                |                                   | N  | 4.08480400  | -0.00001900 | 0.41546400  |
|                |                                   | N  | 3.60863100  | -0.00256500 | -0.66930900 |
|                |                                   | N  | 4.55910100  | 0.00251000  | 1.47557300  |
|                |                                   | H  | -1.23068900 | -0.00031300 | -1.60191300 |
| $\text{N}_3^-$ | $\text{CBr}_3\text{CN}$           | Br | 1.22437900  | -0.24943200 | 0.47538000  |
|                |                                   | Br | -1.28429600 | 1.73917400  | -0.37827500 |
|                |                                   | Br | -1.60543900 | -1.41990800 | -0.80087900 |
|                |                                   | C  | -0.82734700 | -0.02479300 | 0.33102400  |
|                |                                   | N  | 4.04156500  | 0.01830300  | -0.30447600 |
|                |                                   | N  | 3.52350700  | -0.49976200 | 0.63727400  |
|                |                                   | N  | 4.55445600  | 0.51512700  | -1.20938700 |
|                |                                   | C  | -1.42619500 | -0.14091800 | 1.64249000  |
|                |                                   | N  | -1.86113700 | -0.24080000 | 2.70387600  |
| $\text{N}_3^-$ | $\text{C}_3\text{Br}_2\text{F}_6$ | C  | 1.68526200  | -1.61621100 | 0.06505800  |
|                |                                   | C  | 0.82383100  | -0.41260900 | -0.35235100 |
|                |                                   | C  | 1.18833700  | 0.85315900  | 0.44291900  |
|                |                                   | F  | 1.33596400  | -2.70246400 | -0.62144200 |
|                |                                   | F  | 1.56603200  | -1.88291800 | 1.36492000  |
|                |                                   | F  | 2.98790700  | -1.40915000 | -0.18579600 |
|                |                                   | F  | 1.15071200  | -0.16988100 | -1.65837500 |
|                |                                   | F  | 2.50967500  | 1.10624400  | 0.36099100  |
|                |                                   | F  | 0.90233400  | 0.69856300  | 1.73649600  |
|                |                                   | Br | -1.10061700 | -0.86019400 | -0.16612500 |
|                |                                   | Br | 0.25557100  | 2.41792500  | -0.23289000 |
|                |                                   | N  | -3.51759700 | -1.38371600 | 0.01891500  |
|                |                                   | N  | -4.13112300 | -0.38346500 | 0.19480600  |
|                |                                   | N  | -4.73436400 | 0.59144300  | 0.36636600  |
| $\text{NCO}^-$ | $\text{CBr}_4$                    | Br | -1.58895300 | -1.20517800 | -1.22032900 |
|                |                                   | Br | -0.98965600 | 1.84695900  | -0.57851500 |
|                |                                   | Br | -1.40139300 | -0.22167100 | 1.79400600  |
|                |                                   | Br | 1.30405600  | -0.37662500 | 0.00463100  |
|                |                                   | C  | -0.63610600 | 0.00547400  | 0.00118300  |
|                |                                   | N  | 3.67843100  | -0.87296500 | 0.00906500  |
|                |                                   | C  | 4.58635400  | -0.10483700 | 0.00034700  |
|                |                                   | O  | 5.52594800  | 0.64812100  | -0.00817200 |

|                               |                                  |            |             |             |             |
|-------------------------------|----------------------------------|------------|-------------|-------------|-------------|
| NCO <sup>-a</sup>             | CBr <sub>4</sub>                 | Br         | -1.60755900 | -1.41689900 | -0.91539100 |
|                               |                                  | Br         | -0.99110400 | 1.69632400  | -0.91792900 |
|                               |                                  | Br         | -1.30331900 | 0.14290500  | 1.83099600  |
|                               |                                  | Br         | 1.28908700  | -0.37024900 | 0.00149400  |
|                               |                                  | C          | -0.61590100 | 0.00807400  | -0.00031500 |
|                               |                                  | O          | 3.73244400  | -0.92482200 | 0.00389600  |
|                               |                                  | C          | 4.58327200  | -0.03125100 | 0.00129300  |
|                               |                                  | N          | 5.39822100  | 0.81639700  | -0.00114400 |
| a) C-Br...O-C mode of bonding |                                  |            |             |             |             |
| NCO <sup>-</sup>              | CBr <sub>3</sub> NO <sub>2</sub> | Br         | 1.63958300  | -1.58361900 | -0.48349700 |
|                               |                                  | Br         | 1.63977000  | 1.58354100  | -0.48338400 |
|                               |                                  | Br         | -1.23190900 | 0.00011300  | -0.33599000 |
|                               |                                  | C          | 0.72585300  | -0.00000900 | 0.15627900  |
|                               |                                  | N          | -3.48455600 | 0.00029000  | -0.95287200 |
|                               |                                  | C          | -4.39440300 | 0.00004600  | -0.18250600 |
|                               |                                  | O          | -5.33432100 | -0.00019500 | 0.56140300  |
|                               |                                  | N          | 0.77735200  | -0.00006800 | 1.70261200  |
|                               |                                  | O          | 0.74845900  | -1.07326500 | 2.25111800  |
| O                             | 0.74850600                       | 1.07308800 | 2.25118900  |             |             |
| NCO <sup>-a</sup>             | CBr <sub>3</sub> NO <sub>2</sub> | Br         | 1.84344200  | -1.34982600 | -0.61467600 |
|                               |                                  | Br         | 1.18524700  | 1.74478000  | -0.59753800 |
|                               |                                  | Br         | -1.19027500 | -0.37390700 | -0.06651700 |
|                               |                                  | C          | 0.70842300  | 0.02367300  | 0.14546300  |
|                               |                                  | C          | -4.43319600 | -0.06262100 | -0.15344800 |
|                               |                                  | N          | 0.97736800  | 0.06601700  | 1.68680000  |
|                               |                                  | O          | 1.21151900  | -0.98640600 | 2.22087800  |
|                               |                                  | O          | 0.85434700  | 1.13076900  | 2.23118200  |
|                               |                                  | O          | -3.56606000 | -0.91434000 | -0.37796700 |
|                               |                                  | N          | -5.26227300 | 0.74210500  | 0.05759600  |
| a) C-Br...O-C mode of bonding |                                  |            |             |             |             |
| NCO <sup>-</sup>              | CBr <sub>3</sub> F               | Br         | -1.07059700 | 0.28980100  | 0.05866500  |
|                               |                                  | Br         | 1.45585700  | -1.73788000 | -0.23894800 |
|                               |                                  | Br         | 1.96320900  | 1.41878900  | -0.25315300 |
|                               |                                  | C          | 0.80768800  | -0.01412100 | 0.44830000  |
|                               |                                  | N          | -3.51565900 | 0.70259400  | -0.35503700 |
|                               |                                  | F          | 1.01386400  | -0.04176700 | 1.77725800  |
|                               |                                  | C          | -4.51989000 | 0.09634200  | -0.17351600 |
|                               |                                  | O          | -5.55479500 | -0.50130900 | 0.00144000  |



|                  |                                               |    |             |             |             |
|------------------|-----------------------------------------------|----|-------------|-------------|-------------|
| NCO <sup>-</sup> | CBr <sub>3</sub> H                            | Br | -1.00828400 | 0.04080400  | -0.02032300 |
|                  |                                               | Br | 1.78515600  | -1.62434700 | -0.04287800 |
|                  |                                               | Br | 1.85372000  | 1.57681600  | -0.02648700 |
|                  |                                               | C  | 0.84093300  | -0.00514100 | 0.52582900  |
|                  |                                               | N  | -3.53440000 | 0.13990800  | -0.59358600 |
|                  |                                               | H  | 0.90350700  | -0.01223900 | 1.60617500  |
|                  |                                               | C  | -4.60491500 | 0.01891300  | -0.09926200 |
|                  |                                               | O  | -5.70619300 | -0.10179200 | 0.39107400  |
| NCO <sup>-</sup> | CBr <sub>3</sub> CN                           | Br | 1.15372900  | -0.30118900 | 0.36703200  |
|                  |                                               | Br | -1.28839800 | 1.76276300  | -0.37083400 |
|                  |                                               | Br | -1.73099900 | -1.38637300 | -0.75578500 |
|                  |                                               | C  | -0.83818700 | -0.01434300 | 0.32733400  |
|                  |                                               | C  | -1.38980900 | -0.10196700 | 1.66506600  |
|                  |                                               | N  | -1.79963300 | -0.17833400 | 2.73737800  |
|                  |                                               | C  | 4.29511900  | -0.05614800 | -0.18953700 |
|                  |                                               | O  | 5.13537000  | 0.54252800  | -0.80392600 |
|                  |                                               | N  | 3.48716500  | -0.66988200 | 0.43402100  |
| NCO <sup>-</sup> | C <sub>3</sub> Br <sub>2</sub> F <sub>6</sub> | C  | 1.48675900  | -1.80506600 | 0.02264200  |
|                  |                                               | C  | 0.79639100  | -0.47765200 | -0.35621100 |
|                  |                                               | C  | 1.38052400  | 0.70659200  | 0.44490700  |
|                  |                                               | F  | 0.95702200  | -2.81769600 | -0.65766400 |
|                  |                                               | F  | 1.37555300  | -2.06373400 | 1.32427100  |
|                  |                                               | F  | 2.79383000  | -1.78345000 | -0.27559600 |
|                  |                                               | F  | 1.12562400  | -0.26759200 | -1.66732300 |
|                  |                                               | F  | 2.72133700  | 0.73410300  | 0.33670200  |
|                  |                                               | F  | 1.09708500  | 0.58417500  | 1.74181900  |
|                  |                                               | Br | -1.13113300 | -0.62660800 | -0.11700400 |
|                  |                                               | Br | 0.71099700  | 2.41083000  | -0.19702400 |
|                  |                                               | C  | -4.60511200 | -0.14900900 | 0.14706200  |
|                  |                                               | N  | -3.64422800 | -0.84465500 | 0.16267600  |
|                  |                                               | O  | -5.59638400 | 0.54292200  | 0.13524500  |
| NCS <sup>-</sup> | CBr <sub>4</sub>                              | Br | 1.38304700  | -0.74416500 | 1.73237000  |
|                  |                                               | Br | 1.87682200  | 1.60948300  | -0.34434600 |
|                  |                                               | Br | 1.25880300  | -1.32809500 | -1.38810000 |
|                  |                                               | Br | -1.11474200 | 0.39859000  | -0.00053900 |
|                  |                                               | C  | 0.83474200  | -0.01546900 | -0.00035200 |
|                  |                                               | S  | -3.90322000 | 1.04085700  | 0.00083900  |
|                  |                                               | N  | -4.94558100 | -1.59953600 | 0.00080900  |
|                  |                                               | C  | -4.51256900 | -0.51960200 | 0.00075500  |

|                   |                                                 |                               |             |                                                      |             |
|-------------------|-------------------------------------------------|-------------------------------|-------------|------------------------------------------------------|-------------|
| NCS <sup>-b</sup> | CBr <sub>4</sub>                                | Br                            | 1.51583000  | 1.69233700                                           | -0.86094300 |
|                   |                                                 | Br                            | 1.68248200  | 0.03170400                                           | 1.83859900  |
|                   |                                                 | Br                            | -0.91496400 | -0.22438000                                          | -0.01882800 |
|                   |                                                 | Br                            | 1.89552300  | -1.45595800                                          | -0.95492700 |
|                   |                                                 | C                             | 1.00636500  | 0.00618100                                           | -0.00121100 |
|                   |                                                 | S                             | -6.24074200 | 0.21179900                                           | 0.00851100  |
|                   |                                                 | N                             | -3.51389400 | -0.52379100                                          | -0.02756300 |
|                   |                                                 | C                             | -4.64158600 | -0.21482300                                          | -0.01208000 |
|                   |                                                 | b) C-Br...N≡C mode of bonding |             |                                                      |             |
| NCS <sup>-</sup>  | CBr <sub>3</sub> NO <sub>2</sub>                | Br                            | -1.03737700 | -0.38428000                                          | 0.24455200  |
|                   |                                                 | Br                            | 1.80731000  | -1.04250900                                          | -1.27251900 |
|                   |                                                 | Br                            | 1.33243800  | 1.85238800                                           | -0.08370300 |
|                   |                                                 | C                             | 0.97026500  | -0.02659100                                          | 0.13921600  |
|                   |                                                 | N                             | 1.53932100  | -0.49662000                                          | 1.49254100  |
|                   |                                                 | O                             | 1.56842700  | 0.31099600                                           | 2.38769000  |
|                   |                                                 | O                             | 1.82621700  | -1.66473500                                          | 1.58637500  |
|                   |                                                 | C                             | -4.23340100 | 0.50850100                                           | -0.47054100 |
|                   |                                                 | S                             | -3.73969600 | -0.85064600                                          | 0.37912600  |
|                   |                                                 | N                             | -4.58591500 | 1.44702800                                           | -1.05856200 |
| NCS <sup>-c</sup> | CBr <sub>3</sub> CONH <sub>2</sub>              | Br                            | 1.48244800  | 1.18243700                                           | -1.33178400 |
|                   |                                                 | Br                            | 2.11864400  | -1.37444500                                          | 0.45820200  |
|                   |                                                 | Br                            | -0.88576800 | -0.72284000                                          | -0.36276100 |
|                   |                                                 | C                             | 0.82331400  | 0.04002700                                           | 0.12468000  |
|                   |                                                 | S                             | -4.32208500 | -0.73178300                                          | -0.39840200 |
|                   |                                                 | N                             | -3.25145600 | 1.47643500                                           | 1.00140900  |
|                   |                                                 | C                             | -3.72699900 | 0.57457500                                           | 0.42781400  |
|                   |                                                 | C                             | 0.76915000  | 0.97615300                                           | 1.38234000  |
|                   |                                                 | O                             | 1.78207400  | 1.15789200                                           | 2.02123200  |
|                   |                                                 | N                             | -0.40547600 | 1.57072600                                           | 1.61325000  |
|                   |                                                 | H                             | -0.42310100 | 2.20707300                                           | 2.39525500  |
|                   |                                                 | H                             | -1.31075000 | 1.38333600                                           | 1.16967800  |
|                   |                                                 |                               |             | c) Combined C-Br...S-C and N-H...N-C mode of bonding |             |
| NCS <sup>-d</sup> | CBr <sub>3</sub> CONH <sub>2</sub> <sup>c</sup> | Br                            | 1.48244800  | 1.18243700                                           | -1.33178400 |
|                   |                                                 | Br                            | 2.11864400  | -1.37444500                                          | 0.45820200  |
|                   |                                                 | Br                            | -0.88576800 | -0.72284000                                          | -0.36276100 |
|                   |                                                 | C                             | 0.82331400  | 0.04002700                                           | 0.12468000  |
|                   |                                                 | S                             | -4.32208500 | -0.73178300                                          | -0.39840200 |
|                   |                                                 | N                             | -3.25145600 | 1.47643500                                           | 1.00140900  |
|                   |                                                 | C                             | -3.72699900 | 0.57457500                                           | 0.42781400  |
|                   |                                                 | C                             | 0.76915000  | 0.97615300                                           | 1.38234000  |
|                   |                                                 | O                             | 1.78207400  | 1.15789200                                           | 2.02123200  |
|                   |                                                 | N                             | -0.40547600 | 1.57072600                                           | 1.61325000  |
|                   |                                                 | H                             | -0.42310100 | 2.20707300                                           | 2.39525500  |
|                   |                                                 | H                             | -1.31075000 | 1.38333600                                           | 1.16967800  |
|                   |                                                 |                               |             | d) Combined C-Br...N-C and N-H...S-C mode of bonding |             |

|                             |                                               |    |             |             |             |
|-----------------------------|-----------------------------------------------|----|-------------|-------------|-------------|
| NCS <sup>-</sup>            | CBr <sub>3</sub> F                            | Br | -0.87216200 | -0.29510100 | -0.02292500 |
|                             |                                               | Br | 2.17784100  | -1.42288900 | -0.04396800 |
|                             |                                               | Br | 1.66166200  | 1.71879200  | -0.37564200 |
|                             |                                               | C  | 0.99484300  | 0.06710600  | 0.44354100  |
|                             |                                               | F  | 1.10781000  | 0.22355000  | 1.77060600  |
|                             |                                               | C  | -4.39075600 | 0.40822100  | 0.21470500  |
|                             |                                               | S  | -3.70985900 | -0.87299300 | -0.62237600 |
|                             |                                               | N  | -4.87056800 | 1.29656300  | 0.79454400  |
| NCS <sup>-</sup>            | CBr <sub>3</sub> H                            | Br | -0.81555300 | 0.00001100  | -0.17346300 |
|                             |                                               | Br | 2.00042800  | -1.59915600 | 0.01833900  |
|                             |                                               | Br | 2.00042500  | 1.59915100  | 0.01838600  |
|                             |                                               | C  | 0.99796900  | -0.00002100 | 0.51031300  |
|                             |                                               | N  | -4.59779700 | -0.00011100 | 1.73730900  |
|                             |                                               | H  | 0.96094600  | -0.00003000 | 1.59181300  |
|                             |                                               | S  | -3.78975500 | 0.00006100  | -0.98404100 |
|                             |                                               | C  | -4.26893700 | -0.00004200 | 0.61927400  |
| NCS <sup>-</sup>            | CBr <sub>3</sub> CN                           | Br | 0.95395200  | -0.37784200 | 0.34057600  |
|                             |                                               | Br | -1.45997600 | 1.80577600  | -0.06359100 |
|                             |                                               | Br | -1.92621500 | -1.22306200 | -0.99568800 |
|                             |                                               | C  | -1.05556100 | -0.06413400 | 0.31892300  |
|                             |                                               | N  | 4.46586700  | 1.43902200  | -1.15276000 |
|                             |                                               | C  | -1.61030900 | -0.38245200 | 1.61831500  |
|                             |                                               | N  | -2.02114900 | -0.64442000 | 2.66059100  |
|                             |                                               | C  | 4.14541700  | 0.51467800  | -0.52457600 |
|                             |                                               | S  | 3.69613100  | -0.82133100 | 0.38273900  |
| NCS <sup>-</sup>            | C <sub>3</sub> Br <sub>2</sub> F <sub>6</sub> | C  | 1.97557400  | -1.53753000 | 0.03544500  |
|                             |                                               | C  | 1.03601200  | -0.38286200 | -0.37260200 |
|                             |                                               | C  | 1.36190500  | 0.92585500  | 0.38323000  |
|                             |                                               | F  | 1.72399000  | -2.61483600 | -0.70486100 |
|                             |                                               | F  | 1.83848800  | -1.86446800 | 1.31682100  |
|                             |                                               | F  | 3.26080100  | -1.21772800 | -0.16630800 |
|                             |                                               | F  | 1.29247500  | -0.15190400 | -1.69065600 |
|                             |                                               | F  | 2.63571300  | 1.28562900  | 0.13900600  |
|                             |                                               | F  | 1.25699000  | 0.72759500  | 1.70088500  |
|                             |                                               | Br | -0.81895200 | -0.91834000 | -0.10597100 |
|                             |                                               | Br | 0.21637800  | 2.38715400  | -0.14554900 |
|                             |                                               | S  | -3.80979400 | -1.39911000 | 0.20953500  |
|                             |                                               | C  | -3.97068400 | 0.25966700  | 0.04758700  |
|                             |                                               | N  | -4.06373900 | 1.41541100  | -0.06647200 |
| N <sub>3</sub> <sup>-</sup> | -                                             | N  | 0.00000000  | 0.00000000  | 1.17435200  |
|                             |                                               | N  | 0.00000000  | 0.00000000  | 0.00000000  |
|                             |                                               | N  | 0.00000000  | 0.00000000  | -1.17435200 |

|                  |   |   |            |            |             |
|------------------|---|---|------------|------------|-------------|
| NCO <sup>-</sup> | - | N | 0.00000000 | 0.00000000 | -1.25491400 |
|                  |   | C | 0.00000000 | 0.00000000 | -0.07123100 |
|                  |   | O | 0.00000000 | 0.00000000 | 1.15147300  |
| NCS <sup>-</sup> | - | N | 0.00000000 | 0.00000000 | -1.80722400 |
|                  |   | C | 0.00000000 | 0.00000000 | -0.63917700 |
|                  |   | S | 0.00000000 | 0.00000000 | 1.03035200  |

| Anion                       | R-Br                               | Calculations in CH <sub>2</sub> Cl <sub>2</sub> |             |             |             |
|-----------------------------|------------------------------------|-------------------------------------------------|-------------|-------------|-------------|
| N <sub>3</sub> <sup>-</sup> | CBr <sub>4</sub>                   | Br                                              | 1.14745300  | 0.64551700  | 1.76716000  |
|                             |                                    | Br                                              | -1.25877100 | -0.51693600 | 0.00508700  |
|                             |                                    | Br                                              | 1.74013900  | -1.52206100 | -0.47399200 |
|                             |                                    | Br                                              | 0.91710000  | 1.42944400  | -1.29946000 |
|                             |                                    | C                                               | 0.62735000  | 0.00639700  | -0.00048500 |
|                             |                                    | N                                               | -4.42711900 | -0.05930700 | 0.00214800  |
|                             |                                    | N                                               | -3.90031100 | -1.11307300 | 0.00682200  |
|                             |                                    | N                                               | -4.93990600 | 0.98707700  | -0.00252400 |
| N <sub>3</sub> <sup>-</sup> | CBr <sub>3</sub> NO <sub>2</sub>   | Br                                              | -1.19515300 | -0.26032700 | 0.42147500  |
|                             |                                    | Br                                              | 1.46090300  | -1.33260500 | -1.06327800 |
|                             |                                    | Br                                              | 1.14474500  | 1.76505400  | -0.49508200 |
|                             |                                    | C                                               | 0.74055900  | -0.00876400 | 0.13005800  |
|                             |                                    | N                                               | -4.21364900 | -0.00393600 | -0.22515700 |
|                             |                                    | N                                               | -3.74625300 | -0.54974900 | 0.71264800  |
|                             |                                    | N                                               | -4.66218400 | 0.53546500  | -1.15141800 |
|                             |                                    | N                                               | 1.37532200  | -0.20254400 | 1.54485100  |
|                             |                                    | O                                               | 1.45949000  | 0.77502800  | 2.24101600  |
| O                           | 1.65509200                         | -1.32831900                                     | 1.86450600  |             |             |
| N <sub>3</sub> <sup>-</sup> | CBr <sub>3</sub> CONH <sub>2</sub> | Br                                              | 0.91025003  | -0.12725865 | 0.28899288  |
|                             |                                    | Br                                              | -1.62950097 | 1.85774835  | -0.10003412 |
|                             |                                    | Br                                              | -1.70512597 | -1.03139765 | -1.43845212 |
|                             |                                    | C                                               | -1.08466997 | 0.00936035  | 0.11511288  |
|                             |                                    | N                                               | 4.30333800  | 0.10949300  | -0.13294100 |
|                             |                                    | N                                               | 3.67053600  | -0.47037300 | 0.68798400  |
|                             |                                    | N                                               | 4.92943000  | 0.67089900  | -0.92918900 |
|                             |                                    | C                                               | -1.82258397 | -0.60435565 | 1.33543588  |
|                             |                                    | O                                               | -2.83821897 | -0.13372065 | 1.78775988  |
|                             |                                    | N                                               | -1.25506797 | -1.74615765 | 1.79933688  |
|                             |                                    | H                                               | -1.66586797 | -2.14704765 | 2.62636888  |
|                             |                                    | H                                               | -0.30427497 | -1.98070065 | 1.55667188  |

|                             |                                               |    |             |             |             |
|-----------------------------|-----------------------------------------------|----|-------------|-------------|-------------|
| N <sub>3</sub> <sup>-</sup> | CBr <sub>3</sub> F                            | Br | 1.15573700  | -0.00013100 | 0.52030700  |
|                             |                                               | Br | -1.55915900 | 1.60199900  | -0.40056100 |
|                             |                                               | Br | -1.55931700 | -1.60186400 | -0.40071000 |
|                             |                                               | C  | -0.82350700 | -0.00001400 | 0.47731400  |
|                             |                                               | N  | 4.39597257  | 0.00001134  | -0.39938315 |
|                             |                                               | N  | 3.93036457  | -0.00018766 | 0.69305485  |
|                             |                                               | N  | 4.85720657  | 0.00021834  | -1.46194715 |
|                             |                                               | F  | -1.31112600 | -0.00005100 | 1.73045900  |
| N <sub>3</sub> <sup>-</sup> | CBr <sub>3</sub> H                            | Br | 1.0733      | -0.00111    | -0.55148    |
|                             |                                               | Br | -1.66933    | -1.60252    | 0.22645     |
|                             |                                               | Br | -1.66767    | 1.60366     | 0.22522     |
|                             |                                               | C  | -0.88458    | -0.00009    | -0.57608    |
|                             |                                               | N  | 4.43635     | -0.00022    | 0.39913     |
|                             |                                               | N  | 3.96018     | -0.00277    | -0.68565    |
|                             |                                               | N  | 4.91065     | 0.00231     | 1.45924     |
|                             |                                               | H  | -1.23069    | -0.00031    | -1.60191    |
| N <sub>3</sub> <sup>-</sup> | CBr <sub>3</sub> CN                           | Br | 1.22437900  | -0.24943200 | 0.47538000  |
|                             |                                               | Br | -1.17617881 | 1.72733649  | -0.37066806 |
|                             |                                               | Br | -1.49732181 | -1.43174551 | -0.79327206 |
|                             |                                               | C  | -0.71922981 | -0.03663051 | 0.33863094  |
|                             |                                               | N  | 4.41010437  | -0.02182372 | -0.27852516 |
|                             |                                               | N  | 3.89204637  | -0.53988872 | 0.66322484  |
|                             |                                               | N  | 4.92299537  | 0.47500028  | -1.18343616 |
|                             |                                               | C  | -1.31807781 | -0.15275551 | 1.65009694  |
|                             |                                               | N  | -1.75301981 | -0.25263751 | 2.71148294  |
| N <sub>3</sub> <sup>-</sup> | C <sub>3</sub> Br <sub>2</sub> F <sub>6</sub> | C  | 1.68526200  | -1.61621100 | 0.06505800  |
|                             |                                               | C  | 0.82383100  | -0.41260900 | -0.35235100 |
|                             |                                               | C  | 1.18833700  | 0.85315900  | 0.44291900  |
|                             |                                               | F  | 1.33596400  | -2.70246400 | -0.62144200 |
|                             |                                               | F  | 1.56603200  | -1.88291800 | 1.36492000  |
|                             |                                               | F  | 2.98790700  | -1.40915000 | -0.18579600 |
|                             |                                               | F  | 1.15071200  | -0.16988100 | -1.65837500 |
|                             |                                               | F  | 2.50967500  | 1.10624400  | 0.36099100  |
|                             |                                               | F  | 0.90233400  | 0.69856300  | 1.73649600  |
|                             |                                               | Br | -1.10061700 | -0.86019400 | -0.16612500 |
|                             |                                               | Br | 0.25557100  | 2.41792500  | -0.23289000 |
|                             |                                               | N  | -3.97572208 | -1.48294668 | 0.05398830  |
|                             |                                               | N  | -4.58924808 | -0.48269568 | 0.22987930  |
|                             |                                               | N  | -5.19248908 | 0.49221232  | 0.40143930  |

|                  |                  |    |             |             |             |
|------------------|------------------|----|-------------|-------------|-------------|
| NCO <sup>-</sup> | CBr <sub>4</sub> | Br | -1.56119600 | -1.21262300 | -1.24782500 |
|                  |                  | Br | -1.05392100 | 1.84395900  | -0.55621600 |
|                  |                  | Br | -1.44062700 | -0.26507100 | 1.77976600  |
|                  |                  | Br | 1.22377000  | -0.32012100 | 0.02103800  |
|                  |                  | C  | -0.69142900 | 0.00973500  | 0.00060600  |
|                  |                  | N  | 3.92545300  | -0.84225300 | 0.03460700  |
|                  |                  | C  | 4.86262900  | -0.11864500 | 0.00663900  |
|                  |                  | O  | 5.82671500  | 0.61677400  | -0.02155400 |

|                   |                  |    |             |             |             |
|-------------------|------------------|----|-------------|-------------|-------------|
| NCO <sup>-a</sup> | CBr <sub>4</sub> | Br | -1.64583500 | -1.31335700 | -1.02620600 |
|                   |                  | Br | -0.92727100 | 1.77038500  | -0.78983900 |
|                   |                  | Br | -1.31052100 | 0.02305300  | 1.83206900  |
|                   |                  | Br | 1.24078400  | -0.42779900 | -0.01472100 |
|                   |                  | C  | -0.64905400 | 0.01249100  | -0.00273300 |
|                   |                  | O  | 3.91882200  | -1.02424300 | -0.00587200 |
|                   |                  | C  | 4.63304900  | -0.03253900 | -0.00104700 |
|                   |                  | N  | 5.32070600  | 0.92633900  | 0.00343800  |

a) C-Br...O-C mode of bonding

|                  |                                  |    |             |             |             |
|------------------|----------------------------------|----|-------------|-------------|-------------|
| NCO <sup>-</sup> | CBr <sub>3</sub> NO <sub>2</sub> | Br | -1.40777300 | 1.66790400  | -0.63029000 |
|                  |                                  | Br | -1.83827000 | -1.46403200 | -0.42247000 |
|                  |                                  | Br | 1.13044700  | -0.27063200 | -0.23782100 |
|                  |                                  | C  | -0.75796400 | 0.02399600  | 0.13528400  |
|                  |                                  | N  | 3.72371600  | -0.69564500 | -0.74928100 |
|                  |                                  | C  | 4.60382100  | -0.13290200 | -0.18892200 |
|                  |                                  | O  | 5.50856000  | 0.43726100  | 0.37858100  |
|                  |                                  | N  | -0.83876600 | 0.15933800  | 1.69858400  |
|                  |                                  | O  | -0.52795400 | 1.22856000  | 2.15268700  |
|                  |                                  | O  | -1.13359600 | -0.82280000 | 2.32461200  |

|                   |                                  |    |             |             |             |
|-------------------|----------------------------------|----|-------------|-------------|-------------|
| NCO <sup>-a</sup> | CBr <sub>3</sub> NO <sub>2</sub> | Br | 1.81041600  | -1.47486800 | -0.39354800 |
|                   |                                  | Br | 1.38858300  | 1.65365000  | -0.66179000 |
|                   |                                  | Br | -1.14088200 | -0.27016800 | -0.23194200 |
|                   |                                  | C  | 0.73640300  | 0.02543800  | 0.13448200  |
|                   |                                  | C  | -4.58331400 | -0.07739100 | -0.12466500 |
|                   |                                  | N  | 0.81794900  | 0.19749500  | 1.69888800  |
|                   |                                  | O  | 0.46953500  | 1.26522800  | 2.12601400  |
|                   |                                  | O  | 1.15821700  | -0.75597600 | 2.34411000  |
|                   |                                  | O  | -3.74240600 | -0.70518400 | -0.75298700 |
|                   |                                  | N  | -5.39443600 | 0.52789200  | 0.48093900  |

a) C-Br...O-C mode of bonding

|                  |                                    |    |             |             |             |
|------------------|------------------------------------|----|-------------|-------------|-------------|
| NCO <sup>-</sup> | CBr <sub>3</sub> CONH <sub>2</sub> | Br | 1.13064800  | -0.22134700 | 0.27109100  |
|                  |                                    | Br | -1.26688800 | 1.84096500  | -0.05734300 |
|                  |                                    | Br | -1.49606800 | -1.05437200 | -1.35898600 |
|                  |                                    | C  | -0.80422600 | -0.02781700 | 0.16515800  |
|                  |                                    | N  | 3.90109800  | -0.60828800 | 0.52230100  |
|                  |                                    | C  | -1.54827100 | -0.60177000 | 1.41311700  |
|                  |                                    | O  | -2.57528400 | -0.09286200 | 1.80110200  |
|                  |                                    | N  | -0.99917500 | -1.70509700 | 1.94214100  |
|                  |                                    | H  | -1.47695400 | -2.15061300 | 2.71087700  |
|                  |                                    | H  | -0.11587700 | -2.08050600 | 1.63531100  |
|                  |                                    | O  | 5.59053700  | 0.63850000  | -0.63587500 |
|                  |                                    | C  | 4.73385300  | 0.00893700  | -0.05090100 |
| NCO <sup>-</sup> | CBr <sub>3</sub> F                 | Br | 1.01867000  | -0.29916400 | 0.02863500  |
|                  |                                    | Br | -1.45313800 | 1.73781900  | -0.24623500 |
|                  |                                    | Br | -1.98225400 | -1.41110000 | -0.22211400 |
|                  |                                    | C  | -0.84255200 | 0.02314200  | 0.44117200  |
|                  |                                    | N  | 3.70409400  | -0.77608700 | -0.47319500 |
|                  |                                    | F  | -0.98988400 | 0.05914800  | 1.77625800  |
|                  |                                    | C  | 4.63836400  | -0.11433800 | -0.17061200 |
|                  |                                    | O  | 5.59883700  | 0.56037900  | 0.13658900  |
| NCO <sup>-</sup> | CBr <sub>3</sub> H                 | Br | -0.96643600 | -0.00005400 | -0.05710300 |
|                  |                                    | Br | 1.81996900  | -1.59829100 | -0.01966200 |
|                  |                                    | Br | 1.81989200  | 1.59833000  | -0.02016900 |
|                  |                                    | C  | 0.86823700  | 0.00007800  | 0.53531300  |
|                  |                                    | N  | -3.75537800 | -0.00014100 | -0.83477900 |
|                  |                                    | H  | 0.87687000  | 0.00025600  | 1.61698000  |
|                  |                                    | C  | -4.69123900 | 0.00000200  | -0.10979400 |
|                  |                                    | O  | -5.65263300 | 0.00009400  | 0.63325700  |
| NCO <sup>-</sup> | CBr <sub>3</sub> CN                | Br | 1.07465800  | -0.26790300 | 0.40677100  |
|                  |                                    | Br | -1.31338900 | 1.75256600  | -0.36989200 |
|                  |                                    | Br | -1.69368000 | -1.39815500 | -0.78812600 |
|                  |                                    | C  | -0.86221400 | -0.01885100 | 0.31354600  |
|                  |                                    | C  | -1.41989400 | -0.12949100 | 1.65101700  |
|                  |                                    | N  | -1.84835600 | -0.22040800 | 2.71311200  |
|                  |                                    | C  | 4.44767100  | -0.06013200 | -0.17298600 |
|                  |                                    | O  | 5.17577800  | 0.53821000  | -0.93303500 |
|                  |                                    | N  | 3.73904000  | -0.64853600 | 0.57381200  |

|                  |                                               |    |             |             |             |
|------------------|-----------------------------------------------|----|-------------|-------------|-------------|
| NCO <sup>-</sup> | C <sub>3</sub> Br <sub>2</sub> F <sub>6</sub> | C  | 1.51989500  | -1.80852600 | 0.03248600  |
|                  |                                               | C  | 0.83423700  | -0.47482100 | -0.35757900 |
|                  |                                               | C  | 1.39013000  | 0.72243300  | 0.45628500  |
|                  |                                               | F  | 0.98747600  | -2.81383600 | -0.65503700 |
|                  |                                               | F  | 1.38513300  | -2.05938400 | 1.33072900  |
|                  |                                               | F  | 2.82058400  | -1.77534400 | -0.25593700 |
|                  |                                               | F  | 1.15645600  | -0.26635800 | -1.66080700 |
|                  |                                               | F  | 2.72801600  | 0.73580600  | 0.37226600  |
|                  |                                               | F  | 1.07186700  | 0.58573900  | 1.74458200  |
|                  |                                               | Br | -1.07543100 | -0.63511900 | -0.13902400 |
|                  |                                               | Br | 0.72821500  | 2.41440900  | -0.20020300 |
|                  |                                               | C  | -4.78500400 | -0.16071600 | 0.15271100  |
|                  |                                               | N  | -3.83013000 | -0.86035700 | 0.16071900  |
|                  |                                               | O  | -5.76723200 | 0.55219100  | 0.14529000  |
| NCS <sup>-</sup> | CBr <sub>4</sub>                              | Br | -1.32606500 | -1.04541700 | -1.58470200 |
|                  |                                               | Br | -1.89451300 | 1.64386700  | -0.00066300 |
|                  |                                               | Br | -1.32555200 | -1.04384200 | 1.58588600  |
|                  |                                               | Br | 1.04004200  | 0.39879000  | -0.00050400 |
|                  |                                               | C  | -0.86894200 | -0.01229300 | -0.00012000 |
|                  |                                               | S  | 4.15826800  | 1.05602600  | 0.00002100  |
|                  |                                               | N  | 4.85443500  | -1.69041900 | -0.00007900 |
|                  |                                               | C  | 4.56890300  | -0.55977400 | 0.00005600  |
| NCS <sup>-</sup> | CBr <sub>4</sub>                              | Br | 1.51237900  | 1.72356600  | -0.81325800 |
|                  |                                               | Br | 1.71161800  | -0.01193600 | 1.83686900  |
|                  |                                               | Br | -0.85962100 | -0.24720700 | -0.02198600 |
|                  |                                               | Br | 1.93876500  | -1.41626300 | -0.99818200 |
|                  |                                               | C  | 1.06083300  | 0.00887300  | -0.00145400 |
|                  |                                               | S  | -6.39789400 | 0.22815500  | 0.00924000  |
|                  |                                               | N  | -3.68363600 | -0.56676000 | -0.02707800 |
|                  |                                               | C  | -4.80386200 | -0.23700500 | -0.01167600 |
| NCS <sup>-</sup> | CBr <sub>3</sub> NO <sub>2</sub>              | Br | -0.94148200 | -0.43761900 | 0.21198200  |
|                  |                                               | Br | 1.86292500  | -1.02653800 | -1.24396600 |
|                  |                                               | Br | 1.26958700  | 1.85805300  | -0.08451800 |
|                  |                                               | C  | 0.96546000  | -0.02402900 | 0.13148200  |
|                  |                                               | N  | 1.53206900  | -0.48958500 | 1.51967000  |
|                  |                                               | O  | 1.67099300  | 0.34800300  | 2.36891600  |
|                  |                                               | O  | 1.72098700  | -1.67085700 | 1.64202400  |
|                  |                                               | C  | -4.23255700 | 0.59255900  | -0.40766500 |
|                  |                                               | S  | -4.02062700 | -0.92163100 | 0.25832900  |
|                  |                                               | N  | -4.37339500 | 1.65121100  | -0.87482700 |



|                  |                                    |    |             |             |             |
|------------------|------------------------------------|----|-------------|-------------|-------------|
| NCS <sup>-</sup> | CBr <sub>3</sub> CONH <sub>2</sub> | Br | 1.37304900  | -1.74745900 | -0.52982900 |
|                  |                                    | Br | 1.51538000  | 0.53030300  | 1.69403900  |
|                  |                                    | Br | -0.93621200 | 0.41705400  | -0.35080700 |
|                  |                                    | C  | 0.96944900  | 0.12113400  | -0.13961700 |
|                  |                                    | S  | -4.21221800 | 0.72346900  | -0.52304600 |
|                  |                                    | N  | -4.26795400 | -1.58837900 | 1.11294500  |
|                  |                                    | C  | -4.24832100 | -0.63626000 | 0.43917600  |
|                  |                                    | C  | 1.76541900  | 1.12453600  | -1.03364600 |
|                  |                                    | O  | 1.31107400  | 2.22909200  | -1.22471600 |
|                  |                                    | N  | 2.95730500  | 0.70352800  | -1.48098000 |
|                  |                                    | H  | 3.52538500  | 1.35991800  | -1.99515200 |
|                  |                                    | H  | 3.30917600  | -0.22706700 | -1.32672900 |

|                   |                                    |    |             |             |             |
|-------------------|------------------------------------|----|-------------|-------------|-------------|
| NCS <sup>-b</sup> | CBr <sub>3</sub> CONH <sub>2</sub> | Br | 1.53090600  | -0.57234700 | 1.69348900  |
|                   |                                    | Br | 1.28244200  | 1.82802500  | -0.39063700 |
|                   |                                    | Br | -0.81912600 | -0.54532900 | -0.45925500 |
|                   |                                    | C  | 1.03018200  | -0.09328700 | -0.13584500 |
|                   |                                    | N  | -3.66553100 | -1.29460000 | -0.86388500 |
|                   |                                    | S  | -4.94540700 | 0.78947400  | 0.55807200  |
|                   |                                    | C  | -4.19924900 | -0.43585200 | -0.27748000 |
|                   |                                    | C  | 1.96353400  | -0.94184200 | -1.05898200 |
|                   |                                    | O  | 1.59309600  | -2.02713400 | -1.44095900 |
|                   |                                    | N  | 3.17154500  | -0.41676400 | -1.31315600 |
|                   |                                    | H  | 3.82397100  | -0.97284400 | -1.84506700 |
|                   |                                    | H  | 3.45112500  | 0.50155400  | -1.00917000 |

b) C-Br...N≡C mode of bonding

|                   |                                    |    |             |             |             |
|-------------------|------------------------------------|----|-------------|-------------|-------------|
| NCS <sup>-c</sup> | CBr <sub>3</sub> CONH <sub>2</sub> | Br | 1.62787200  | 1.12194000  | -1.32238100 |
|                   |                                    | Br | 2.01579500  | -1.44153700 | 0.54002500  |
|                   |                                    | Br | -0.88044200 | -0.62622200 | -0.44665300 |
|                   |                                    | C  | 0.84755800  | 0.05079800  | 0.11720200  |
|                   |                                    | S  | -4.42383900 | -0.68713800 | -0.42758600 |
|                   |                                    | N  | -3.33151700 | 1.44439800  | 1.07204700  |
|                   |                                    | C  | -3.80497300 | 0.57074200  | 0.45665100  |
|                   |                                    | C  | 0.79892000  | 1.00385600  | 1.35834600  |
|                   |                                    | O  | 1.83804000  | 1.23866700  | 1.93892100  |
|                   |                                    | N  | -0.38419200 | 1.54247300  | 1.65740200  |
|                   |                                    | H  | -0.39686200 | 2.19561700  | 2.42781300  |
|                   |                                    | H  | -1.27797500 | 1.33245000  | 1.21816300  |

c) Combined C-Br...S-C/N-H...N-C mode of bonding

|                                                   |                                                 |    |             |             |             |
|---------------------------------------------------|-------------------------------------------------|----|-------------|-------------|-------------|
| NCS <sup>-d</sup>                                 | CBr <sub>3</sub> CONH <sub>2</sub> <sup>c</sup> | Br | 0.57678800  | 1.58593600  | -0.99087700 |
|                                                   |                                                 | Br | 2.59451900  | -0.69668500 | -0.09270000 |
|                                                   |                                                 | Br | -0.50554300 | -1.33756400 | -0.29464800 |
|                                                   |                                                 | C  | 0.81463600  | 0.01802700  | 0.15331000  |
|                                                   |                                                 | N  | -3.99816200 | -1.73428300 | -0.32528500 |
|                                                   |                                                 | S  | -3.56083200 | 1.01089000  | 0.21844700  |
|                                                   |                                                 | C  | -3.82271200 | -0.60323300 | -0.10248200 |
|                                                   |                                                 | C  | 0.62279900  | 0.49093700  | 1.63574700  |
|                                                   |                                                 | O  | 1.57132300  | 0.53351400  | 2.38707900  |
|                                                   |                                                 | N  | -0.62709300 | 0.84966600  | 1.94565700  |
|                                                   |                                                 | H  | -0.79082600 | 1.19424800  | 2.88011400  |
|                                                   |                                                 | H  | -1.41975400 | 0.81228000  | 1.30389800  |
| d) Combined C-Br...N-C/N-H....S-C mode of bonding |                                                 |    |             |             |             |
| NCS <sup>-</sup>                                  | CBr <sub>3</sub> F                              | Br | -0.75093977 | -0.27041431 | 0.00268266  |
|                                                   |                                                 | Br | 2.29906323  | -1.39820231 | -0.01836034 |
|                                                   |                                                 | Br | 1.78288423  | 1.74347869  | -0.35003434 |
|                                                   |                                                 | C  | 1.11606523  | 0.09179269  | 0.46914866  |
|                                                   |                                                 | F  | 1.22903223  | 0.24823669  | 1.79621366  |
|                                                   |                                                 | C  | -4.51197823 | 0.38353431  | 0.18909734  |
|                                                   |                                                 | S  | -3.83108123 | -0.89767969 | -0.64798366 |
|                                                   |                                                 | N  | -4.99179023 | 1.27187631  | 0.76893634  |
| NCS <sup>-</sup>                                  | CBr <sub>3</sub> H                              | Br | -0.720146   | -0.000069   | -0.127855   |
|                                                   |                                                 | Br | 2.058585    | -1.597437   | 0.058417    |
|                                                   |                                                 | Br | 2.058121    | 1.598031    | 0.059813    |
|                                                   |                                                 | C  | 1.085745    | -0.000064   | 0.564287    |
|                                                   |                                                 | N  | -4.547435   | 0.000947    | 1.703862    |
|                                                   |                                                 | H  | 1.026194    | -0.000576   | 1.644370    |
|                                                   |                                                 | S  | -3.909487   | -0.001100   | -1.056031   |
|                                                   |                                                 | C  | -4.286641   | 0.000126    | 0.566615    |
| NCS <sup>-</sup>                                  | CBr <sub>3</sub> CN                             | Br | 0.95395200  | -0.37784200 | 0.34057600  |
|                                                   |                                                 | Br | -1.36713821 | 1.79128296  | -0.06259065 |
|                                                   |                                                 | Br | -1.83337721 | -1.23755504 | -0.99468765 |
|                                                   |                                                 | C  | -0.96272321 | -0.07862704 | 0.31992335  |
|                                                   |                                                 | N  | 4.72434829  | 1.39721816  | -1.14878566 |
|                                                   |                                                 | C  | -1.51747121 | -0.39694504 | 1.61931535  |
|                                                   |                                                 | N  | -1.92831121 | -0.65891304 | 2.66159135  |
|                                                   |                                                 | C  | 4.40389829  | 0.47287416  | -0.52060166 |
|                                                   |                                                 | S  | 3.95461229  | -0.86313484 | 0.38671334  |

|                             |                                               |    |             |             |             |
|-----------------------------|-----------------------------------------------|----|-------------|-------------|-------------|
| NCS <sup>-</sup>            | C <sub>3</sub> Br <sub>2</sub> F <sub>6</sub> | C  | 1.97557400  | -1.53753000 | 0.03544500  |
|                             |                                               | C  | 1.03601200  | -0.38286200 | -0.37260200 |
|                             |                                               | C  | 1.36190500  | 0.92585500  | 0.38323000  |
|                             |                                               | F  | 1.72399000  | -2.61483600 | -0.70486100 |
|                             |                                               | F  | 1.83848800  | -1.86446800 | 1.31682100  |
|                             |                                               | F  | 3.26080100  | -1.21772800 | -0.16630800 |
|                             |                                               | F  | 1.29247500  | -0.15190400 | -1.69065600 |
|                             |                                               | F  | 2.63571300  | 1.28562900  | 0.13900600  |
|                             |                                               | F  | 1.25699000  | 0.72759500  | 1.70088500  |
|                             |                                               | Br | -0.81895200 | -0.91834000 | -0.10597100 |
|                             |                                               | Br | 0.21637800  | 2.38715400  | -0.14554900 |
|                             |                                               | S  | -4.24617804 | -1.46925759 | 0.25556946  |
|                             |                                               | C  | -4.40706804 | 0.18951941  | 0.09362146  |
|                             |                                               | N  | -4.50012304 | 1.34526341  | -0.02043754 |
| N <sub>3</sub> <sup>-</sup> | -                                             | N  | 0.00000000  | 0.00000000  | 1.17221000  |
|                             |                                               | N  | 0.00000000  | 0.00000000  | 0.00000000  |
|                             |                                               | N  | 0.00000000  | 0.00000000  | -1.17221000 |
| NCO <sup>-</sup>            | -                                             | N  | 0.00000000  | 0.00000000  | -1.25230900 |
|                             |                                               | C  | 0.00000000  | 0.00000000  | -0.06965400 |
|                             |                                               | O  | 0.00000000  | 0.00000000  | 1.14801100  |
| NCS <sup>-</sup>            | -                                             | N  | 0.00000000  | 0.00000000  | -1.80408300 |
|                             |                                               | C  | 0.00000000  | 0.00000000  | -0.63663200 |
|                             |                                               | S  | 0.00000000  | 0.00000000  | 1.02802300  |

Table S9. Results of the CSD (version 5.35, Nov. 2013) search for the structures containing non-covalent intermolecular contacts shorter than sum of the corresponding van der Waals radii and involving covalently-bonded chlorine, bromine or iodine atom and azide anions R-X...N<sub>3</sub> (where X= Cl, Br, or I and R = Cl, Br, I or C).<sup>a</sup>

| Refcode | Contact | X...N,<br>Å | Compound name                                                                                                                                                                             |
|---------|---------|-------------|-------------------------------------------------------------------------------------------------------------------------------------------------------------------------------------------|
| RIHQAC  | Br...N  | 3.187       | bis((μ-azido)-(N-(5-bromo-2-(hydroxy)benzylidene)pyridine-4-carbohydrazonato)-methanol-manganese)                                                                                         |
| CAPVOF  | Cl...N  | 3.150       | bis(μ-Azido-N,N')-bis(azido-(4,5-dichloro-1,2-bis(2-pyridinecarboxamido)benzene))-(meso-5,7,7,12,14,14-hexamethyl-1,4,8,11-tetra-azacyclotetradecane)-copper(ii)-di-iron(iii) dihydrate   |
| CESTAW  | Cl...N  | 3.277       | bis(μ-acetato)-tetrakis(μ-azido)-bis(μ-4-chloro-2-((2-dimethylaminoethylimino)methyl)phenolato-N,N',O,O)-tetra-copper(ii)                                                                 |
| EFISAO  | Br...N  | 3.035       | catena-(bis(μ-Azido-N,N)-bis(μ-azido-N,N')-bis(4-bromopyridine-N)-di-copper(ii))                                                                                                          |
|         | Br...N  | 3.221       |                                                                                                                                                                                           |
| EHEWOE  | Cl...N  | 3.230       | catena-((μ-Azido-N,N)-(μ-2-chloropyridine-3-carboxylato)-(μ-methanol)-copper(ii) methanol solvate)                                                                                        |
| EPAKAI  | Cl...N  | 3.129       | azido-(4-chloro-2-(((2-(morpholin-4-yl)ethyl)imino)methyl)phenolato-N,N',O)-(4-chloro-2-(((2-(morpholin-4-yl)ethyl)imino)methyl)phenolato-N,O)-cobalt(iii) methanol solvate               |
| FOXTUI  | Br...N  | 3.269       | bis(μ-Azido-N,N)-bis(2,4-dibromo-6-((3-(cyclohexylamino)propylimino)-methyl)phenolato-N,N',O)-di-copper(ii)                                                                               |
| GITLIE  | Cl...N  | 3.037       | catena-(pentakis(μ-Azido-N,N)-(μ-azido-N,N')-hexakis(3-chloropyridyl)-tri-copper)                                                                                                         |
|         | Cl...N  | 3.268       | catena-(pentakis(μ-Azido-N,N)-(μ-azido-N,N')-hexakis(3-chloropyridyl)-tri-copper)                                                                                                         |
| JUVZEF  | Br...N  | 3.226       | catena(bis(μ-Azido-N,N)-(2-bromopyridinato)-copper(ii))                                                                                                                                   |
| MILROP  | Cl...N  | 3.274       | catena-(bis(μ-Azido-N,N')-(μ-3,5-bis(bis(2-(ethylthio)ethyl)aminomethyl)-pyrazolato)-di-nickel(ii) perchlorate dichloromethane solvate)                                                   |
| NEHJAL  | Cl...N  | 3.284       | trans-Diazido-bis(2-chloropyridyl)-palladium(ii)                                                                                                                                          |
| NODCOZ  | Br...N  | 3.076       | catena-(bis(μ-azido-N,N)-(3-bromopyridine)-zinc(ii))                                                                                                                                      |
| PUCWUF  | Cl...N  | 3.287       | bis((μ-Azido)-(azido)-(cyclohexylimido))-tetrapyriddy-d-titanium(iv) dichloromethane solvate                                                                                              |
| RETCAV  | Br...N  | 3.348       | catena-((μ-azido)-(4,4'-bromo-N,N'-ethylene-bis(salicylideneaminato))-manganese(iii))                                                                                                     |
| RIXSOG  | Cl...N  | 3.06        | (μ-Oxo)-(μ-bis(1,3,5-trimethyl-1,3-cyclohexanedicarboximide-5-carboxylato)-N,N'-4,6-dimethyl-m-phenylene)-bis(azido-(2,2'-bipyridyl)-iron) 1,3,5-trimethylbenzene dichloromethane solvate |
| SILKOO  | Cl...N  | 3.099       | azido(N,N'-bis(3-(2-nitrophenyl)prop-2-enylidene)ethylenediamine)-(triphenylphosphine)copper(i) chloroform solvate                                                                        |
| TEKKUR  | Br...N  | 3.381       | tris(tetramethylammonium) (μ-oxo)-tris(μ-2,4-dibromo-6-[(oxidoimino)-methyl]phenolato)-hexakis(μ-azido)-dichloro-tri-manganese(iii)-di-zinc(ii)                                           |
|         | Br...N  | 3.055       |                                                                                                                                                                                           |
|         | Br...N  | 3.159       |                                                                                                                                                                                           |
|         | Br...N  | 3.058       |                                                                                                                                                                                           |

a) Note that the sum of the van der Waals radii are 3.30Å for Cl...N contact and 3.40Å for Br...N contact (A. Bondi, *J. Phys. Chem.* 1964, **68**, 441).

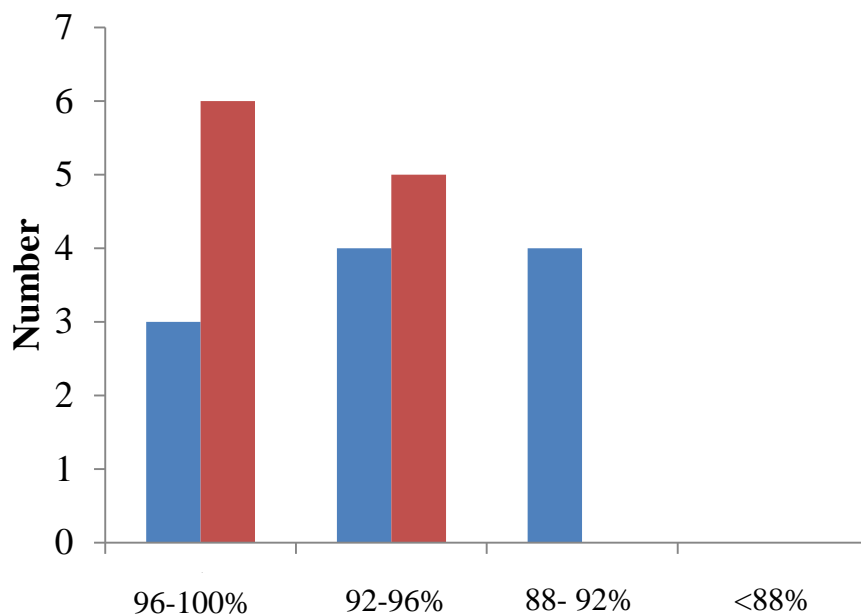

**Figure S8.** Numbers of crystallographically independent intermolecular contacts involving covalently-bonded chlorine or bromine atoms and azide anions  $R-X \dots N_3$  ( $X = Br$ , blue and  $X = Cl$ , red) which are in the 96-100%, 92-96%, 88-92% and less than 88% range of the corresponding sums of the van der Waals radii (CSD version 5.35). Note that all these contacts involve coordinated azide anions, see Table S9 above for the details.
